# Supplementary material for: Applicability of a microRNA-based dynamic risk score for type 1 diabetes
Source: Research Square preprint supplement (doi:10.21203/rs.3.rs-5053763/v1), 2024-10-17
Supplement: Supplementary file 1 [file 155984a64781a0179022c146.xlsx]

## Sheet: Sheet3
A) Genes targeted by has-miR-27b-3p (Source - miRPathDB Ver 2.0) https://mpd.bioinf.uni-sb.de/
miRNA	Chromosome location	target pathway	target genes	p-values	GO	Ref
hsa-mir-27b-3p	9q22.32	protein serine/threonine/tyrosine kinase activity	ACVR2B	0.02	GO:0004712	https://mpd.bioinf.uni-sb.de/mirna.html?mirna=hsa-miR-27b-3p&organism=hsa
hsa-mir-27b-3p	9q22.32	protein serine/threonine/tyrosine kinase activity	ADORA1	0.02	GO:0004712	https://mpd.bioinf.uni-sb.de/mirna.html?mirna=hsa-miR-27b-3p&organism=hsa
hsa-mir-27b-3p	9q22.32	protein serine/threonine/tyrosine kinase activity	CLK4	0.02	GO:0004712	https://mpd.bioinf.uni-sb.de/mirna.html?mirna=hsa-miR-27b-3p&organism=hsa
hsa-mir-27b-3p	9q22.32	protein serine/threonine/tyrosine kinase activity	CRK	0.02	GO:0004712	https://mpd.bioinf.uni-sb.de/mirna.html?mirna=hsa-miR-27b-3p&organism=hsa
hsa-mir-27b-3p	9q22.32	protein serine/threonine/tyrosine kinase activity	DAB2IP	0.02	GO:0004712	https://mpd.bioinf.uni-sb.de/mirna.html?mirna=hsa-miR-27b-3p&organism=hsa
hsa-mir-27b-3p	9q22.32	protein serine/threonine/tyrosine kinase activity	DYRK1A	0.02	GO:0004712	https://mpd.bioinf.uni-sb.de/mirna.html?mirna=hsa-miR-27b-3p&organism=hsa
hsa-mir-27b-3p	9q22.32	protein serine/threonine/tyrosine kinase activity	DYRK3	0.02	GO:0004712	https://mpd.bioinf.uni-sb.de/mirna.html?mirna=hsa-miR-27b-3p&organism=hsa
hsa-mir-27b-3p	9q22.32	protein serine/threonine/tyrosine kinase activity	EGF	0.02	GO:0004712	https://mpd.bioinf.uni-sb.de/mirna.html?mirna=hsa-miR-27b-3p&organism=hsa
hsa-mir-27b-3p	9q22.32	protein serine/threonine/tyrosine kinase activity	EGFR	0.02	GO:0004712	https://mpd.bioinf.uni-sb.de/mirna.html?mirna=hsa-miR-27b-3p&organism=hsa
hsa-mir-27b-3p	9q22.32	protein serine/threonine/tyrosine kinase activity	EIF2AK2	0.02	GO:0004712	https://mpd.bioinf.uni-sb.de/mirna.html?mirna=hsa-miR-27b-3p&organism=hsa
hsa-mir-27b-3p	9q22.32	protein serine/threonine/tyrosine kinase activity	EPHB2	0.02	GO:0004712	https://mpd.bioinf.uni-sb.de/mirna.html?mirna=hsa-miR-27b-3p&organism=hsa
hsa-mir-27b-3p	9q22.32	protein serine/threonine/tyrosine kinase activity	GRM1	0.02	GO:0004712	https://mpd.bioinf.uni-sb.de/mirna.html?mirna=hsa-miR-27b-3p&organism=hsa
hsa-mir-27b-3p	9q22.32	protein serine/threonine/tyrosine kinase activity	KIDINS220	0.02	GO:0004712	https://mpd.bioinf.uni-sb.de/mirna.html?mirna=hsa-miR-27b-3p&organism=hsa
hsa-mir-27b-3p	9q22.32	protein serine/threonine/tyrosine kinase activity	MAP2K6	0.02	GO:0004712	https://mpd.bioinf.uni-sb.de/mirna.html?mirna=hsa-miR-27b-3p&organism=hsa
hsa-mir-27b-3p	9q22.32	protein serine/threonine/tyrosine kinase activity	MAP2K7	0.02	GO:0004712	https://mpd.bioinf.uni-sb.de/mirna.html?mirna=hsa-miR-27b-3p&organism=hsa
hsa-mir-27b-3p	9q22.32	protein serine/threonine/tyrosine kinase activity	MAP3K13	0.02	GO:0004712	https://mpd.bioinf.uni-sb.de/mirna.html?mirna=hsa-miR-27b-3p&organism=hsa
hsa-mir-27b-3p	9q22.32	protein serine/threonine/tyrosine kinase activity	MAP3K4	0.02	GO:0004712	https://mpd.bioinf.uni-sb.de/mirna.html?mirna=hsa-miR-27b-3p&organism=hsa
hsa-mir-27b-3p	9q22.32	protein serine/threonine/tyrosine kinase activity	MAP3K7	0.02	GO:0004712	https://mpd.bioinf.uni-sb.de/mirna.html?mirna=hsa-miR-27b-3p&organism=hsa
hsa-mir-27b-3p	9q22.32	protein serine/threonine/tyrosine kinase activity	MAP3K9	0.02	GO:0004712	https://mpd.bioinf.uni-sb.de/mirna.html?mirna=hsa-miR-27b-3p&organism=hsa
hsa-mir-27b-3p	9q22.32	protein serine/threonine/tyrosine kinase activity	MAP4K5	0.02	GO:0004712	https://mpd.bioinf.uni-sb.de/mirna.html?mirna=hsa-miR-27b-3p&organism=hsa
hsa-mir-27b-3p	9q22.32	protein serine/threonine/tyrosine kinase activity	MAPK1	0.02	GO:0004712	https://mpd.bioinf.uni-sb.de/mirna.html?mirna=hsa-miR-27b-3p&organism=hsa
hsa-mir-27b-3p	9q22.32	protein serine/threonine/tyrosine kinase activity	MAPK10	0.02	GO:0004712	https://mpd.bioinf.uni-sb.de/mirna.html?mirna=hsa-miR-27b-3p&organism=hsa
hsa-mir-27b-3p	9q22.32	protein serine/threonine/tyrosine kinase activity	MAPK14	0.02	GO:0004712	https://mpd.bioinf.uni-sb.de/mirna.html?mirna=hsa-miR-27b-3p&organism=hsa
hsa-mir-27b-3p	9q22.32	protein serine/threonine/tyrosine kinase activity	MAPK9	0.02	GO:0004712	https://mpd.bioinf.uni-sb.de/mirna.html?mirna=hsa-miR-27b-3p&organism=hsa
hsa-mir-27b-3p	9q22.32	protein serine/threonine/tyrosine kinase activity	MAPKAPK3	0.02	GO:0004712	https://mpd.bioinf.uni-sb.de/mirna.html?mirna=hsa-miR-27b-3p&organism=hsa
hsa-mir-27b-3p	9q22.32	protein serine/threonine/tyrosine kinase activity	MAPKAPK5	0.02	GO:0004712	https://mpd.bioinf.uni-sb.de/mirna.html?mirna=hsa-miR-27b-3p&organism=hsa
hsa-mir-27b-3p	9q22.32	protein serine/threonine/tyrosine kinase activity	MLKL	0.02	GO:0004712	https://mpd.bioinf.uni-sb.de/mirna.html?mirna=hsa-miR-27b-3p&organism=hsa
hsa-mir-27b-3p	9q22.32	protein serine/threonine/tyrosine kinase activity	NRK	0.02	GO:0004712	https://mpd.bioinf.uni-sb.de/mirna.html?mirna=hsa-miR-27b-3p&organism=hsa
hsa-mir-27b-3p	9q22.32	protein serine/threonine/tyrosine kinase activity	PAK3	0.02	GO:0004712	https://mpd.bioinf.uni-sb.de/mirna.html?mirna=hsa-miR-27b-3p&organism=hsa
hsa-mir-27b-3p	9q22.32	protein serine/threonine/tyrosine kinase activity	PRKAA2	0.02	GO:0004712	https://mpd.bioinf.uni-sb.de/mirna.html?mirna=hsa-miR-27b-3p&organism=hsa
hsa-mir-27b-3p	9q22.32	protein serine/threonine/tyrosine kinase activity	PSEN1	0.02	GO:0004712	https://mpd.bioinf.uni-sb.de/mirna.html?mirna=hsa-miR-27b-3p&organism=hsa
hsa-mir-27b-3p	9q22.32	protein serine/threonine/tyrosine kinase activity	RPS6KA2	0.02	GO:0004712	https://mpd.bioinf.uni-sb.de/mirna.html?mirna=hsa-miR-27b-3p&organism=hsa
hsa-mir-27b-3p	9q22.32	protein serine/threonine/tyrosine kinase activity	RPS6KB1	0.02	GO:0004712	https://mpd.bioinf.uni-sb.de/mirna.html?mirna=hsa-miR-27b-3p&organism=hsa
hsa-mir-27b-3p	9q22.32	protein serine/threonine/tyrosine kinase activity	TGFBR1	0.02	GO:0004712	https://mpd.bioinf.uni-sb.de/mirna.html?mirna=hsa-miR-27b-3p&organism=hsa
hsa-mir-27b-3p	9q22.32	protein serine/threonine/tyrosine kinase activity	TNIK	0.02	GO:0004712	https://mpd.bioinf.uni-sb.de/mirna.html?mirna=hsa-miR-27b-3p&organism=hsa
hsa-mir-27b-3p	9q22.32	protein serine/threonine/tyrosine kinase activity	TRAF7	0.02	GO:0004712	https://mpd.bioinf.uni-sb.de/mirna.html?mirna=hsa-miR-27b-3p&organism=hsa
B) Tyrosine kinase genes reportedly targeted by Imatinib	Reference
BCR-ABL1	Druker BJ, et al. Nat Med. 1996 (PMID: 8616716), O'Brien, et al. N Engl J Med. 2003 (PMID: 12637609)
CSF1R	Hu et al. Clin Exp Immunol. 2019 (PMID: 30281780)
ABL	Hoemberger et al. Proc Natl Acad Sci USA. 2020 (PMID: 32719139)
c-KIT	Seeliger et al. Structure. 2007 (PMID: 17355866), Capdeville et al. Nat Rev Drug Discov. 2002 (PMID: 12120256), Krause et al N Engl J Med. 2005 (PMID: 16014887)
PDGFR-β	Seeliger et al. Structure. 2007 (PMID: 17355866), Capdeville et al. Nat Rev Drug Discov. 2002 (PMID: 12120256), Krause et al N Engl J Med. 2005 (PMID: 16014887)
C-FMS	Dewar et al. Blood. 2005 (PMID: 15637141)
LCK	Lee et al. Leukemia 2010 (PMID: 20147973), Seggewiss et al. Blood 2005 (PMID: 15572591)
ABL2	Salah et al. J Med Chem. 2011 (PMID: 21417343), Procaccia et al. 2014 (PMID: 24759231)
c-MET	Chen et al. Int J Clin Exp Med. 2019 (ISSN:1940-5901)
C) Other microRNAs that are significantly different across UQ and LQ in Imatinib trial and targeting relevant pathways (Source miRPathDB Ver 2.0 https://mpd.bioinf.uni-sb.de/)
		Mature sequence	Seed	Database	Pathway	Evidence	Hits	Expected hits	P-value	Targets
1	hsa-miR-27b-3p	UUCACAGUGGCUAAGUUCUGC	UCACAGU	Gene Ontology - Molecular Function	protein serine/threonine/tyrosine kinase activity	predicted (intersection)	36	20.72	0.02	ACVR2B, ADORA1,CLK4,CRK,DAB2IP,DYRK1A,DYRK3,EGF,EGFR,EIF2AK2,EPHB2,GRM1,KIDINS220,MAP2K6,MAP2K7,MAP3K13,MAP3K4,MAP3K7,MAP3K9,MAP4K5,MAPK1,MAPK10,MAPK14,MAPK9,MAPKAPK3,MAPKAPK5,MLKL,NRK,PAK3,PRKAA2,PSEN1,RPS6KA2,RPS6KB1,TGFBR1,TNIK,TRAF7
2	hsa-miR-374a-5p	UUAUAAUACAACCUGAUAAGUG	UAUAAUA	Gene Ontology - Biological Process	transmembrane receptor protein tyrosine kinase signaling pathway	predicted (intersection)	176	139.7	0.027	ACTR2, ACTR3,ADAMTS12,ADAMTS3,AFAP1L2,AGTR2,AHI1,ANGPT1,ANGPT2,ANKS1A,ANOS1,APP,APPL1,ARHGEF7,ARID5B,ARNT,ATP6V0D2,ATP6V1B2,ATP6V1G1,BDNF,BMP2,BTC,C2CD5,CAMLG,CASP3,CAV2,CBL,CD3EAP,CNOT9,COL4A1,COL4A3,CRIM1,CRK,CSRNP1,CYBB,DDR2,DOCK1,DUSP3,EFEMP1,EFNA2,EFNB2,EIF4EBP2,EPHA3,EPHA4,EPHA5,EPHA6,EPHA7,EPHA8,EPS15,ERBB4,ERBIN,EREG,ERRFI1,ESRP1,FAM83B,FAT4,FER,FGF12,FGF18,FGF2,FGF20,FGF5,FGF9,FGFR2,FLRT…
3	hsa-miR-93-5p	CAAAGUGCUGUUCGUGCAGGUAG	AAAGUGC	Gene Ontology - Molecular Function	protein serine/threonine/tyrosine kinase activity	predicted (intersection)	42	27.4	0.031	ACVR2B, ADAM9,CLK4,CRK,DYRK1A,DYRK2,DYRK3,EGF,EGFR,EIF2AK2,F2R,FRS2,KIDINS220,LRRK2,MAP2K1,MAP2K6,MAP3K1,MAP3K11,MAP3K12,MAP3K13,MAP3K20,MAP3K21,MAP3K3,MAP3K5,MAP3K7,MAP3K8,MAP3K9,MAP4K2,MAP4K5,MAPK1,MAPK14,MAPK9,MAPKAPK5,PAK3,PRKAA2,PSEN1,RPS6KA1,RPS6KA2,TAB1,TAOK2,TGFBR1,TNIK
	hsa-miR-93-5p	CAAAGUGCUGUUCGUGCAGGUAG	AAAGUGC	Gene Ontology - Biological Process	transmembrane receptor protein tyrosine kinase signaling pathway	predicted (union)	353	318	0.048	ABI1, ABL1,ACTR2,ACTR3,ADAM17,ADAMTS12,ADAMTS3,ADIPOR1,ADRA2A,AFAP1L2,AGR2,AGTR2,AHI1,ANGPT1,ANGPT2,ANGPT4,ANGPTL1,ANKS1A,ANOS1,APH1A,APH1B,APLN,APP,APPL1,AR,AREG,ARHGEF7,ARID5B,ARNT,ARPC2,ARPC3,ATP6V0A2,ATP6V0A4,ATP6V0B,ATP6V0D1,ATP6V0E1,ATP6V1A,ATP6V1B2,ATP6V1C2,ATP6V1G1,AXL,BCR,BLNK,BMP2,BMP5,CAMLG,CASP3,CAV2,CBL,CBLB,CCBE1,CCN2,CDK5R1,CEACAM1,CEP57,CHN1,CHRNA3,CNOT9,COL4A1,COL4A3,COL4A5,CRIM1…
4	hsa-miR-27a-3p	UUCACAGUGGCUAAGUUCCGC	UCACAGU	Gene Ontology - Molecular Function	protein serine/threonine/tyrosine kinase activity	predicted (intersection)	36	20.57	0.025	ACVR2B, ADORA1,CLK4,DAB2IP,DYRK1A,DYRK3,EGF,EGFR,EIF2AK2,EPHB2,GRM1,KIDINS220,MAP2K6,MAP2K7,MAP3K13,MAP3K4,MAP3K7,MAP3K9,MAP4K5,MAPK1,MAPK10,MAPK14,MAPK9,MAPKAPK3,MAPKAPK5,MLKL,NRK,PAK3,PRKAA2,PSEN1,RPS6KA2,RPS6KB1,TAB1,TGFBR1,TNIK,TRAF7
	hsa-miR-27a-3p	UUCACAGUGGCUAAGUUCCGC	UCACAGU	Reactome	Signaling by Non-Receptor Tyrosine Kinases	experimental (any)	6	1.461	0.028	CCND1, EGFR,ELMO1,HIF1A,KRAS,NRAS
5	hsa-miR-186-5p	CAAAGAAUUCUCCUUUUGGGCU	AAAGAAU	Reactome	Signaling by Receptor Tyrosine Kinases	predicted (intersection)	193	146.9	0.000717	ADAM10, ADAM12,ADCYAP1,ADCYAP1R1,AHCYL1,AKT2,APH1A,ARHGEF7,ATP6V0E1,ATP6V1A,ATP6V1B2,ATP6V1C2,ATP6V1E1,ATP6V1G1,AXL,BDNF,CALM1,CBL,CDC42,CDK5R1,CHEK1,CLTC,COL4A2,COL4A3,COL4A4,COL4A5,COL6A6,COL9A1,COL9A2,CREB1,CRK,CRKL,CXCL12,CYBB,DIAPH1,DLG4,DNAL4,DNM1,DNM3,DOCK1,DOCK3,DUSP3,DUSP6,DUSP7,EGF,EGFR,ELK1,EPGN,EPS15,ERBB4,ERBIN,ESR1,FER,FGF1,FGF10,FGF2,FGF20,FGF23,FGF5,FGF9,FGFBP3,FLRT1,FLRT2,FLRT3,F…
	hsa-miR-186-5p	CAAAGAAUUCUCCUUUUGGGCU	AAAGAAU	Reactome	Signaling by Receptor Tyrosine Kinases	predicted (union)	299	257.1	0.003	ABI1, ADAM10,ADAM12,ADAP1,ADCYAP1,ADCYAP1R1,ADORA2A,AHCYL1,AKT2,ANOS1,APH1A,APH1B,ARF6,ARHGEF7,ATP6V0A2,ATP6V0B,ATP6V0D2,ATP6V0E1,ATP6V1A,ATP6V1B2,ATP6V1C2,ATP6V1E1,ATP6V1F,ATP6V1G1,ATP6V1G2,AXL,BAIAP2,BDNF,BRK1,BTC,CALM1,CBL,CDC42,CDH5,CDK5R1,CHEK1,CILP,CLTC,COL4A1,COL4A2,COL4A3,COL4A4,COL4A5,COL6A3,COL6A5,COL6A6,COL9A1,COL9A2,CREB1,CRK,CRKL,CSN2,CUL5,CXCL12,CYBA,CYBB,DIAPH1,DLG4,DNAL4,DNM1,DNM3…
	hsa-miR-186-5p	CAAAGAAUUCUCCUUUUGGGCU	AAAGAAU	Gene Ontology - Biological Process	transmembrane receptor protein tyrosine kinase signaling pathway	predicted (union)	409	364.4	0.003	ABI1, ACTB,ACTG1,ACTR2,ACTR3,ADAMTS12,ADAMTS3,ADIPOR1,AFAP1L2,AGR2,AGTR2,AHI1,AKT2,ANGPT1,ANGPT2,ANGPT4,ANGPTL1,ANKS1A,ANOS1,AP3S1,APH1A,APH1B,APLN,APP,APPL1,AR,ARHGEF7,ARID5B,ARNT,ARPC1A,ARPC2,ARPC3,ARPC4,ARPC5,ATP6V0A2,ATP6V0B,ATP6V0D2,ATP6V0E1,ATP6V1A,ATP6V1B2,ATP6V1C2,ATP6V1E1,ATP6V1F,ATP6V1G1,ATP6V1G2,AXL,BAIAP2,BCR,BDNF,BLNK,BMP2,BMP5,BRK1,BTC,C2CD5,CADM4,CAMLG,CASP3,CAV2,CBL,CBLB,CCBE1,CD3…
	hsa-miR-186-5p	CAAAGAAUUCUCCUUUUGGGCU	AAAGAAU	Gene Ontology - Molecular Function	protein serine/threonine/tyrosine kinase activity	predicted (intersection)	46	31.01	0.024	ACVR2B, CLK4,CRK,CRKL,DYRK1A,DYRK1B,DYRK2,DYRK3,EGF,EGFR,EIF2AK2,ERCC6,FRS2,GADD45G,JAK2,KIDINS220,LAMTOR3,LRRK2,MAP2K1,MAP2K6,MAP3K12,MAP3K13,MAP3K20,MAP3K21,MAP3K4,MAP3K7,MAP3K8,MAP3K9,MAP4K3,MAP4K5,MAPK1,MAPK10,MAPK14,MAPK9,MAPKAPK3,MAPKAPK5,NRK,PAK3,PRKAA2,PRKCG,PSEN1,RPS6KB1,TAB1,TGFBR1,TNIK,TTK
	hsa-miR-186-5p	CAAAGAAUUCUCCUUUUGGGCU	AAAGAAU	Gene Ontology - Biological Process	transmembrane receptor protein tyrosine kinase signaling pathway	predicted (intersection)	244	208.2	0.035	ACTG1, ACTR2,ACTR3,ADAMTS12,ADAMTS3,AFAP1L2,AKT2,ANGPT1,ANGPT2,ANGPTL1,ANKS1A,APH1A,APLN,APP,APPL1,AR,ARHGEF7,ARPC4,ATP6V0E1,ATP6V1A,ATP6V1B2,ATP6V1C2,ATP6V1E1,ATP6V1G1,AXL,BCR,BDNF,BMP5,CAMLG,CBL,CBLB,CCBE1,CD3EAP,CDC42,CDK5R1,CEP57,COL4A3,COL4A5,CRIM1,CRK,CRKL,CSRNP1,CYBB,DDR2,DNM1,DOCK1,DUSP3,EFEMP1,EFNA5,EFNB2,EFNB3,EGF,EGFR,EIF4EBP2,EPGN,EPHA10,EPHA5,EPHA6,EPHA7,EPHB1,EPN2,EPS15,ERBB4,ERBIN,…
6	hsa-miR-92a-3p	UAUUGCACUUGUCCCGGCCUGU	AUUGCAC	Gene Ontology - Molecular Function	protein tyrosine kinase activity	predicted (union)	93	71.8	0.031	ABI1, ABL2,ADRA1A,ADRA2A,AGT,ALKAL2,ANGPT4,APP,AXL,BDNF,BLK,CAMKK2,CLK3,DDR1,DDR2,DLG3,DLG4,DYRK1A,DYRK2,DYRK3,EFNA5,EFNB3,EGF,EGFR,EIF2AK2,EPGN,EPHA3,EPHA4,EPHA5,EPHA8,EPHB1,ERBB3,ERBB4,EREG,ERRFI1,FBXW7,FER,FGFR1,FGFR1OP,FGFR2,FGFR3,FRK,GPRC5A,GPRC5B,HCK,IBTK,IGF2R,INSR,ITK,JAK2,JAK3,KIT,LRP8,LYN,MAP2K4,MAP2K6,MELK,MET,MUSK,NCF1,NCK2,NEDD9,NEK1,NOX4,NRG1,NRG3,NTRK2,NTRK3,PAK2,PDGFRA,PEAK1,PKDCC…
7	hsa-miR-146a-5p	UGAGAACUGAAUUCCAUGGGUU	GAGAACU	Reactome	Signaling by Non-Receptor Tyrosine Kinases	experimental (any)	5	0.678	0.005	CCND1, EGFR,ERBB4,RAC1,RHOA
	hsa-miR-146a-5p	UGAGAACUGAAUUCCAUGGGUU	GAGAACU	Reactome	Signaling by Non-Receptor Tyrosine Kinases	predicted (intersection)	21	8.589	0.006	CBL, CRK,DOCK1,EGFR,ERBB2,ERBB4,EREG,HIF1A,KRAS,NRAS,NRG1,NRG3,PTPN1,PXN,RAC1,RHOA,SFPQ,SRMS,STAT3,UBA52,UBB
	hsa-miR-146a-5p	UGAGAACUGAAUUCCAUGGGUU	GAGAACU	Reactome	Signaling by Receptor Tyrosine Kinases	experimental (any)	13	5.554	0.016	CXCL12, EGFR,ERBB4,GRAP2,LAMC2,PRKCE,RAC1,RHOA,ROCK1,SOS1,SPP1,STAT1,WASF2
	hsa-miR-146a-5p	UGAGAACUGAAUUCCAUGGGUU	GAGAACU	Reactome	Signaling by Non-Receptor Tyrosine Kinases	experimental (strong)	5	0.929	0.021	CCND1, EGFR,ERBB4,RAC1,RHOA
	hsa-miR-146a-5p	UGAGAACUGAAUUCCAUGGGUU	GAGAACU	Reactome	Signaling by Receptor Tyrosine Kinases	predicted (union)	197	162.8	0.029	ABI1, ADAM12,ADAM17,ADCYAP1R1,AKT2,ANOS1,AP2A2,APH1B,ARF6,ARHGEF7,ATP6V0B,ATP6V0D1,ATP6V0E1,ATP6V1C2,ATP6V1E1,ATP6V1H,BDNF,BRK1,CALM1,CBL,CDK5R1,CHEK1,CLTC,COL4A2,COL4A3,COL4A4,COL6A3,COL6A5,COL9A1,COL9A2,CREB1,CRK,CTNNB1,CUL5,CXCL12,DNM3,DOCK1,DUSP3,DUSP7,EGFR,EPS15,ERBB2,ERBB4,EREG,ESR1,FER,FGF16,FGF2,FGF3,FGF9,FGFBP2,FGFBP3,FLRT1,FLRT2,FLRT3,FLT1,FLT4,FRS2,FURIN,FYN,GAB1,GAB2,GABRA1,GABRB1,GAB…
8	hsa-miR-103a-3p	AGCAGCAUUGUACAGGGCUAUGA	GCAGCAU	Gene Ontology - Molecular Function	protein serine/threonine/tyrosine kinase activity	predicted (intersection)	37	19.26	0.002	ACVR2B, CRKL,DAB2IP,DYRK2,DYRK3,EGFR,ERCC6,FRS2,GADD45G,GRM1,JAK2,KIDINS220,LAMTOR3,LRRK2,MAP2K1,MAP2K6,MAP3K13,MAP3K20,MAP3K21,MAP3K3,MAP3K9,MAP4K2,MAPK1,MAPK10,MAPK14,MAPK9,MAPKAPK3,MAPKAPK5,PAK3,PSEN1,RAPGEF1,RPS6KA2,RPS6KB1,SGK1,TAB1,TNF,TNIK
	hsa-miR-103a-3p	AGCAGCAUUGUACAGGGCUAUGA	GCAGCAU	Gene Ontology - Molecular Function	transmembrane receptor protein tyrosine kinase activity	predicted (union)	50	33.6	0.003	ADORA1, ADRA2A,APP,CBLC,CRIM1,DDR1,DDR2,EFEMP1,EFNA3,EFNA4,EFNB3,EGFR,EPHA1,EPHA2,EPHA3,EPHA4,EPHA5,EPHA7,EPHB2,ERBB2,ERBB4,EREG,ERRFI1,FBXW7,FGFR1,FGFR2,FGFR3,FGFR4,FGFRL1,FLT1,FLT3,GPRC5A,IGF2R,INSR,KDR,NCF1,NEURL1,NRP2,NTRK2,NTRK3,PDGFRA,PDGFRB,PSEN1,RET,SNX6,SOCS4,SOCS5,TGFA,TYRO3,ZFYVE28
	hsa-miR-103a-3p	AGCAGCAUUGUACAGGGCUAUGA	GCAGCAU	Gene Ontology - Biological Process	transmembrane receptor protein tyrosine kinase signaling pathway	predicted (intersection)	167	129.3	0.005	ACTR2, AGT,AKT2,ANGPT4,ANKS1A,ANOS1,APH1B,APLN,AR,ARHGEF7,ARNT,ATP6V0A2,ATP6V1B2,AXL,BAIAP2,BAIAP2L1,BDNF,C2CD5,CASP3,CD4,CD8B,CDK5R1,CEACAM1,CHN1,COL4A3,CRKL,CSF1,DAB2IP,DDR1,DGKD,DLL1,EFNB2,EGFR,EIF4EBP1,EIF4EBP2,EPHA2,EPHA3,EPHA5,EPHA6,EPHA7,ERBB4,FAT4,FBXW7,FGF10,FGF12,FGF18,FGF19,FGF2,FGF5,FGFR2,FGFR3,FGFRL1,FLRT2,FRS2,FSTL4,GAB1,GFRA1,GFRA4,GPER1,GPLD1,GPRC5A,GRB7,GRIN2B,GTF2F1,GTF2F2,HIF1A…
	hsa-miR-103a-3p	AGCAGCAUUGUACAGGGCUAUGA	GCAGCAU	Gene Ontology - Molecular Function	protein tyrosine kinase activity	predicted (union)	113	88.33	0.006	ABL1, ABL2,ADORA1,ADRA1A,ADRA2A,AFAP1L2,AGT,ANGPT4,APP,AXL,BAZ1B,BDNF,CAMKK2,CBLC,CLK4,CRIM1,CSK,DDR1,DDR2,DGKQ,DLG3,DLG4,DOCK3,DOK7,DUSP22,DVL2,DYRK1B,DYRK2,DYRK3,EFEMP1,EFNA3,EFNA4,EFNB3,EGFR,EIF2AK2,EPHA1,EPHA2,EPHA3,EPHA4,EPHA5,EPHA7,EPHB2,ERBB2,ERBB4,ERCC6,EREG,ERRFI1,FBXW7,FCGR1A,FER,FES,FGFR1,FGFR1OP,FGFR2,FGFR3,FGFR4,FGFRL1,FLT1,FLT3,FRK,GPRC5A,IGF2R,INSR,ITK,JAK1,JAK2,JAK3,KDR,LRP8,MAP2K…
	hsa-miR-103a-3p	AGCAGCAUUGUACAGGGCUAUGA	GCAGCAU	Gene Ontology - Biological Process	transmembrane receptor protein tyrosine kinase signaling pathway	predicted (union)	324	283.7	0.014	ABL1, ACTG1,ACTR2,ADAMTS12,ADAMTS3,ADORA1,ADRA2A,ADRB2,AFAP1L2,AGT,AGTR2,AKT2,ANGPT4,ANKS1A,ANOS1,AP2A1,AP2A2,AP2M1,AP3S1,APH1B,APLN,APP,APPL1,AR,ARF4,ARHGEF7,ARNT,ARPC2,ATP6V0A2,ATP6V0B,ATP6V0E1,ATP6V1B2,ATP6V1C2,ATP6V1E1,AXL,BAIAP2,BAIAP2L1,BCAR1,BCR,BDNF,BMP2,BMP5,C2CD5,CASP3,CBL,CBLC,CCND3,CD3E,CD4,CD8B,CDC42,CDK4,CDK5R1,CEACAM1,CHN1,CNOT9,COL4A3,COL4A5,CRIM1,CRKL,CSF1,CSRNP1,CUL5,CYBB,DAB2IP…
9	hsa-miR-223-3p	UGUCAGUUUGUCAAAUACCCCA	GUCAGUU	Gene Ontology - Molecular Function	transmembrane receptor protein tyrosine kinase activity	predicted (union)	42	24.46	0.002	ADAM17, APP,CHMP6,CRIM1,CSF1R,DDR1,DDR2,EFEMP1,EFNB3,EGF,EGFR,EPGN,EPHA3,EPHA8,EPHB1,EPHB2,EPHB3,ERBB2,ERBB4,EREG,FBXW7,FGFR2,FGFRL1,FLT4,IGF2R,INSR,INSRR,KDR,MST1R,NEURL1,NRP1,NRP2,NTRK2,NTRK3,PDGFRA,PDGFRB,PSEN1,SNX6,SOCS4,SOCS5,TYRO3,ZFYVE28
	hsa-miR-223-3p	UGUCAGUUUGUCAAAUACCCCA	GUCAGUU	Gene Ontology - Biological Process	transmembrane receptor protein tyrosine kinase signaling pathway	experimental (any)	9	3.723	0.03	F3, FBXW7,FOXO1,IGF1R,SESN3,STAT3,STAT5A,STMN1,WASL
	hsa-miR-223-3p	UGUCAGUUUGUCAAAUACCCCA	GUCAGUU	Gene Ontology - Molecular Function	protein tyrosine kinase activity	predicted (union)	85	64.3	0.038	ABL2, ACE,ADAM17,ADRA1A,ANGPT4,APP,BAZ1B,CAMKK2,CHMP6,CRIM1,CSF1R,DDR1,DDR2,DYRK2,EFEMP1,EFNA1,EFNA5,EFNB3,EGF,EGFR,EIF2AK2,EPGN,EPHA3,EPHA8,EPHB1,EPHB2,EPHB3,ERBB2,ERBB4,ERCC6,EREG,FBXW7,FCGR1A,FGFR1OP,FGFR2,FGFRL1,FLT4,FRK,FYN,GPRC5B,IBTK,IGF2R,INSR,INSRR,ITK,KDR,LRP8,MAP2K6,MATK,MELK,MST1R,MUSK,NEDD9,NEK1,NEURL1,NOX4,NRG1,NRG3,NRP1,NRP2,NTRK2,NTRK3,PAK2,PDGFRA,PDGFRB,PEAK1,PKDCC,PSEN1,PTK2B,PT…
	hsa-miR-223-3p	UGUCAGUUUGUCAAAUACCCCA	GUCAGUU	Gene Ontology - Biological Process	transmembrane receptor protein tyrosine kinase signaling pathway	predicted (union)	242	206.5	0.045	ACTB, ACTR2,ACTR3,ADAM17,ADAMTS12,ADAMTS3,ANGPT1,ANGPT2,ANGPT4,ANKS1A,APH1A,APLN,APP,APPL1,AR,ARHGEF7,ARID5B,ARPC5,BMP2,BMP5,CAMLG,CBLB,CCBE1,CCN2,CD4,CDH3,CDK4,CDK5R1,CEACAM1,CEP57,CHMP6,CHRNA3,CRIM1,CRKL,CSF1,CSF1R,CTNNB1,DAB2IP,DDIT4,DDR1,DDR2,DGKD,DOK1,DUSP3,EFEMP1,EFNA1,EFNA5,EFNB3,EGF,EGFR,EIF2AK3,EIF4EBP1,EPGN,EPHA10,EPHA3,EPHA6,EPHA8,EPHB1,EPHB2,EPHB3,EPN2,EPS15,ERBB2,ERBB4,ERBIN,EREG,F3,…
	hsa-miR-223-3p	UGUCAGUUUGUCAAAUACCCCA	GUCAGUU	Reactome	Signaling by Receptor Tyrosine Kinases	experimental (any)	7	2.735	0.049	IGF1R, ITGB1,MEF2C,STAT1,STAT3,STAT5A,STMN1
10	hsa-miR-15b-5p	UAGCAGCACAUCAUGGUUUACA	AGCAGCA	Gene Ontology - Biological Process	transmembrane receptor protein tyrosine kinase signaling pathway	predicted (intersection)	215	161.7	0.00011	ABL1, ACTG1,ACTR2,ADAMTS12,ADAMTS3,ADORA1,ADRA2A,ADRB2,AGT,AGTR2,AKT2,ANKS1A,ANOS1,AP2A1,APH1B,APLN,APP,AR,ARHGEF7,ARNT,ATP6V0A1,ATP6V0A2,ATP6V0B,ATP6V1B2,ATP6V1C2,ATP6V1E1,BAIAP2,BAIAP2L1,BCAR1,BCR,BDNF,BMP2,BRK1,CBLC,CCND3,CD3E,CD4,CDC42,CDK5R1,CNOT9,CRIM1,CRKL,CSF1,CSRNP1,DAB2IP,DDR1,DDR2,DGKD,DLL1,DUSP3,EFNA3,EFNA5,EFNB1,EFNB2,EGFR,EIF4EBP1,EIF4EBP2,ELMO2,EPHA1,EPHA7,EPHB2,ERBB4,ERBIN,ERRFI1,…
	hsa-miR-15b-5p	UAGCAGCACAUCAUGGUUUACA	AGCAGCA	Gene Ontology - Biological Process	transmembrane receptor protein tyrosine kinase signaling pathway	predicted (union)	341	285.4	0.000154	ABL1, ACTG1,ACTR2,ADAM17,ADAMTS12,ADAMTS3,ADORA1,ADRA2A,ADRB2,AFAP1L2,AGT,AGTR2,AKT2,ANGPT2,ANKS1A,ANOS1,AP2A1,AP2A2,APH1B,APLN,APP,AR,ARHGEF7,ARID5B,ARNT,ARPC1B,ARPC2,ATP6V0A1,ATP6V0A2,ATP6V0B,ATP6V0E2,ATP6V1A,ATP6V1B2,ATP6V1C2,ATP6V1E1,ATP6V1G1,BAIAP2,BAIAP2L1,BCAR1,BCR,BDNF,BMP2,BRK1,CBL,CBLC,CCBE1,CCND3,CD3E,CD4,CD8B,CDC37,CDC42,CDH3,CDK5R1,CEACAM1,CHMP6,CHRNA3,CNOT9,COL4A1,CRIM1,CRK,CRKL,CSF…
	hsa-miR-15b-5p	UAGCAGCACAUCAUGGUUUACA	AGCAGCA	Gene Ontology - Biological Process	transmembrane receptor protein tyrosine kinase signaling pathway	experimental (any)	51	28.87	0.002	ACTR2, AP2B1,AP2M1,APP,ATP6V0E1,CCND3,CDK4,CRIM1,CRK,CRKL,CYBA,EFNB2,FGF2,FGF5,FGFR4,FOXO1,GPRC5A,GRB2,HNRNPA1,HNRNPM,INSR,KANK1,KDR,LRIG2,MAPK1,MAPKAPK2,MMP9,MTSS1,NCKAP1,NUCKS1,OGT,PAK2,PIK3R1,PLEKHA1,POLR2E,PRKAA1,PRKCD,PTBP1,PTPRJ,RASSF2,RBPJ,RPS6KB1,RTN4,SHOC2,SLC9A6,SOCS5,SPRED1,TGFB1,TXNIP,VAV2,VEGFA
	hsa-miR-15b-5p	UAGCAGCACAUCAUGGUUUACA	AGCAGCA	Reactome	Signaling by Receptor Tyrosine Kinases	experimental (any)	40	21.21	0.003	AKT3, AP2B1,AP2M1,ATP6V0E1,BAX,CHEK1,CRK,CRKL,CYBA,DIAPH1,FGF2,FGF5,FGFR4,FURIN,GGA3,GRB2,HNRNPA1,HNRNPM,INSR,ITGA2,ITPR1,KDR,LAMC1,MAPK1,MAPKAPK2,MMP9,NCKAP1,PAG1,PAK2,PIK3R1,POLR2E,PRKCD,PTBP1,PTPRJ,RANBP10,RPS6KA3,SPRED1,TAB2,VAV2,VEGFA
	hsa-miR-15b-5p	UAGCAGCACAUCAUGGUUUACA	AGCAGCA	Gene Ontology - Molecular Function	transmembrane receptor protein tyrosine kinase activity	predicted (intersection)	34	19.16	0.005	ADORA1, ADRA2A,APP,CBLC,CRIM1,DDR1,DDR2,EFNA3,EGFR,EPHA1,EPHA7,EPHB2,ERBB4,ERRFI1,FBXW7,FGFR1,FGFR2,FGFR3,FGFR4,FLT1,FLT3,GPRC5A,IGF2R,INSR,KDR,NEURL1,NRP1,NRP2,NTRK2,PDGFRA,RET,SNX6,SOCS5,TYRO3
11	hsa-miR-126-3p	UCGUACCGUGAGUAAUAAUGCG	CGUACCG	Reactome	Signaling by Receptor Tyrosine Kinases	experimental (any)	14	1.451	5.07e-09	AKT1, AKT2,CRK,CRKL,CXCL12,GRIN2B,IRS1,KRAS,PGR,PIK3R1,PIK3R2,ROCK1,SPRED1,VEGFA
	hsa-miR-126-3p	UCGUACCGUGAGUAAUAAUGCG	CGUACCG	Gene Ontology - Biological Process	transmembrane receptor protein tyrosine kinase signaling pathway	experimental (any)	14	1.976	1.08e-07	AKT1, AKT2,CRK,CRKL,GRIN2B,IGFBP2,IRS1,PIK3R1,PIK3R2,ROCK1,SIRT1,SPRED1,TEK,VEGFA
	hsa-miR-126-3p	UCGUACCGUGAGUAAUAAUGCG	CGUACCG	Gene Ontology - Molecular Function	protein serine/threonine/tyrosine kinase activity	experimental (any)	5	0.302	0.000176	ACVR2B, ADAM9,AKT1,CRK,CRKL
	hsa-miR-126-3p	UCGUACCGUGAGUAAUAAUGCG	CGUACCG	Gene Ontology - Molecular Function	protein tyrosine kinase binding	experimental (any)	4	0.24	0.000928	CRK, IRS1,PIK3R1,PIK3R2
	hsa-miR-126-3p	UCGUACCGUGAGUAAUAAUGCG	CGUACCG	Reactome	Signaling by Non-Receptor Tyrosine Kinases	experimental (any)	3	0.177	0.002	AKT1, CRK,KRAS
12	hsa-miR-24-3p	UGGCUCAGUUCAGCAGGAACAG	GGCUCAG	Gene Ontology - Molecular Function	protein tyrosine kinase activity	predicted (union)	108	87.1	0.049	ABL2, ACE,ADAM17,ADORA1,ADRA1A,ADRA2A,AGT,ALK,ANGPT4,AXL,CAMKK2,CHMP6,CLK3,CLK4,CSF1R,CSK,DDR1,DDR2,DGKQ,DLG3,DOCK3,DOK7,DUSP22,DYRK1A,DYRK2,DYRK3,EFNA3,EGFR,EIF2AK2,EPGN,EPHA2,EPHA3,EPHA4,EPHA8,ERBB3,EREG,FBXW7,FER,FGFR1,FGFR1OP,FGFR2,FGFR3,FGFR4,FLT1,FLT4,FRK,FYN,GPRC5A,GPRC5B,IGF2R,INSR,INSRR,ITK,JAK1,JAK2,JAK3,KDR,LYN,MAP2K2,MAP2K3,MAP2K6,MAP2K7,MELK,MET,MST1R,MUSK,NCF1,NEDD9,NEURL1,NOX4,NRP1…
13	hsa-miR-210-3p	CUGUGCGUGUGACAGCGGCUGA	UGUGCGU	Gene Ontology - Molecular Function	protein tyrosine kinase activity	experimental (any)	7	1.446	0.012	BDNF, BTK,DYRK2,EFNA3,FGFRL1,PTPN1,PTPN2
