# Supplementary material for: Applicability of a microRNA-based dynamic risk score for type 1 diabetes
Source: Research Square preprint supplement (doi:10.21203/rs.3.rs-5053763/v1), 2024-10-17
Supplement: Supplementary file 2 [file 8b8575eaa26f2ecf9a53fad9.docx]

**Applicability of a microRNA-based Dynamic Risk Score (DRS) for type 1 diabetes**

Mugdha V Joglekar1,*, Wilson KM Wong1,*, Pooja S Kunte1,*, Reshmi A Kulkarni1, Ikhlak Ahmed2, Ryan J Farr1,# , Nhan Ho Trong Pham1, Madilyn Coles1, Cody L Maynard1, Simranjeet Kaur3, Vinod Thorat4, Aniruddha Pant4, Ammira Akil2, Kim Donaghue5, Alicia Jenkins6, Maria E Craig5,7, AM James Shapiro8, William Hague9, Chittaranjan S Yajnik10, Ronald CW Ma11, Elizabeth Davies12, Tim Jones12, Stephen E Gitelman13, Flemming Pociot3,14, and Anandwardhan A. Hardikar 1,
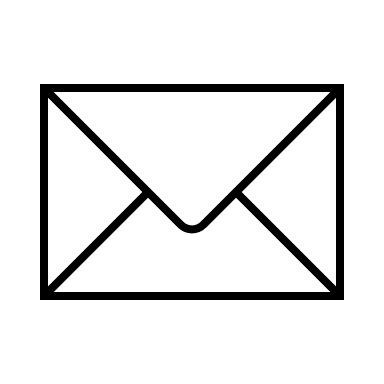
 on behalf of the PREDICT T1D Study Group°.

1. Western Sydney University School of Medicine, Sydney NSW 2560, Australia
2. Sidra Medical Research Center, Doha, Qatar.
3. Steno Diabetes Center Copenhagen, 2730 Herlev, Denmark
4. Healthcare Analytics, AlgoAnalytics, Pune, India.
5. Institute of Endocrinology and Diabetes, The Children's Hospital at Westmead, Westmead, Child and Adolescent Health, Faculty of Medicine and Health, University of Sydney, NSW 2066, Australia
6. The University of Sydney, Faculty of Health, Camperdown, Australia
7. Virology Research Laboratory, Prince of Wales Hospital, University of New South Wales, Sydney, Australia
8. Clinical Islet Transplant Program, University of Alberta, Edmonton, AB T6G 2E1, Canada
9. Discipline of Obstetrics & Gynaecology and Robinson Research Institute, University of Adelaide, Adelaide, SA, Australia
10. Diabetes Unit, KEM Hospital & Research Centre, Pune, India
11. Department of Medicine and Therapeutics, and Li Ka Shing Institute of Health Sciences, The Chinese University of Hong Kong, Hong Kong Special Administrative Region, China
12. Telethon Kids Institute, Northern Entrance, Perth Children's Hospital, Nedlands, Australia
13. University of California San Francisco, San Francisco, CA 94143, USA
14. Faculty of Health and Medical Sciences, University of Copenhagen, Copenhagen, Denmark

#: Currently at: CSIRO Health & Biosecurity, Australian Centre for Disease Preparedness, Geelong, Victoria, Australia

°: A list of all study group members by their affiliations appears at the end of this article.

*MVJ, WKMW and PSK are equal first authors.

All correspondence: AAH


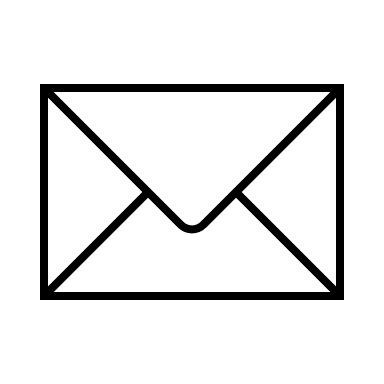
Professor Anandwardhan A. Hardikar

Western Sydney University School of Medicine, 30.2.27 David Pilgrim and Goldsmith Avenue,

Campbelltown, NSW 2560, Australia, E: [a.hardikar@westernsydney.edu.au](mailto:a.hardikar@westernsydney.edu.au), M: +61 488 119 772

**Extended Data Table 1**

| Serial no | MicroRNA | References reporting this microRNA to be significantly different in T1D Vs Controls | HLA | autoAb | early onset (age<= 15) | Associated with T1D | n T1D | n Control | n Total |
| --- | --- | --- | --- | --- | --- | --- | --- | --- | --- |
| 1 | hsa-miR-145-5p | 270593711 |  |  | ✓ | ✓ | 9 | 10 | 19 |
| 2 | hsa-miR-181a-5p | 293463962 |  | ✓ | ✓ | ✓ | 8 | 17 | 25 |
| 315829773 |  | ✓ |  | ✓ | 29 | 19 | 48 |
| 268926294 |  |  | ✓ | ✓ | 40 | 40 | 80 |
| 3 | hsa-miR-127-3p | 346910485 |  |  |  | ✓ | 26 | 26 | 52 |
| 4 | hsa-miR-125b-5p | 293463962 |  | ✓ | ✓ | ✓ | 8 | 17 | 25 |
| 294532046 |  |  |  | ✓ | 95 | 30 | 125 |
| 5 | hsa-miR-199a-3p | 293463962 |  | ✓ | ✓ | ✓ | 8 | 17 | 25 |
| 6 | hsa-miR-148a-3p | 293463962 |  | ✓ | ✓ | ✓ | 8 | 17 | 25 |
| 275585307 |  |  |  | ✓ | 16 | 27 | 43 |
| 7 | hsa-miR-210-3p | 296796268  (Screening + Validation) | ✓ |  |  | ✓ | 60 | 40 | 100 |
| 8 | hsa-miR-93-5p | 293463962 |  | ✓ | ✓ | ✓ | 8 | 17 | 25 |
| 9 | hsa-miR-27a-3p | 228298059  (Discovery + Validation) |  |  | ✓ | ✓ | 512 | 205 | 717 |
| 10 | hsa-miR-20a-5p | 293463962 |  | ✓ | ✓ | ✓ | 8 | 17 | 25 |
| 11 | hsa-miR-16-5p | 2872972110  (Discovery + Validation) |  |  |  | ✓ | 36 | 36 | 72 |
| 293463962 |  | ✓ | ✓ | ✓ | 8 | 17 | 25 |
| 12 | hsa-miR-25-3p | 293463962 |  | ✓ | ✓ | ✓ | 8 | 17 | 25 |
| 2872972110  (Discovery + Validation) |  |  |  | ✓ | 36 | 36 | 72 |
| 315829773 |  |  |  | ✓ | 29 | 19 | 48 |
| 228298059  (Discovery + Validation) |  |  |  | ✓ | 512 | 205 | 717 |
| Sheet et al, 2019; International Journal of Pharmaceutical Research11 |  |  |  | ✓ | 20 | 10 | 30 |
| 13 | hsa-miR-30a-5p | 228298059  (Discovery + Validation) |  |  |  | ✓ | 512 | 205 | 717 |
| 14 | hsa-miR-26b-5p | 2937042212  (Discovery + Validation + Training) |  |  |  | ✓ | 79 | 91 | 170 |
| 15 | hsa-miR-146a-5p | 315829773 |  |  |  | ✓ | 29 | 19 | 48 |
| 3194085313 |  |  |  | ✓ | 88 | 47 | 135 |
| 3492740714 |  |  |  | ✓ | 90 | 90 | 180 |
| 275585307 |  |  |  | ✓ | 16 | 27 | 43 |
| 293463962 |  | ✓ | ✓ | ✓ | 8 | 17 | 25 |
| 296796268  (Screening + Validation) | ✓ |  | ✓ | ✓ | 60 | 40 | 100 |
| 16 | hsa-miR-24-3p | 270593711 |  |  | ✓ | ✓ | 9 | 10 | 19 |
| 228298059  (Discovery + Validation) |  |  |  | ✓ | 512 | 205 | 717 |
| 3272889215 |  |  | ✓ | ✓ | 150 | 47 | 197 |
| 275585307 |  |  |  | ✓ | 16 | 27 | 43 |
| 2823965116  (Discovery + Validation) |  |  | ✓ | ✓ | 63 | 32 | 95 |
| 293463962 |  | ✓ | ✓ | ✓ | 8 | 17 | 25 |
| 3025960617 |  | ✓ | ✓ | ✓ | 9 | 10 | 19 |
| 17 | hsa-miR-22-5p | 293463962 |  | ✓ | ✓ | ✓ | 8 | 17 | 25 |
| 18 | hsa-miR-27b-3p | 293463962 |  | ✓ | ✓ | ✓ | 8 | 17 | 25 |
| 228298059  (Discovery + Validation) |  |  |  | ✓ | 512 | 205 | 717 |
| 19 | hsa-miR-26a-5p | 228298059  (Discovery + Validation) |  |  |  | ✓ | 512 | 205 | 717 |
| 20 | hsa-miR-222-3p | 2823965116  (Discovery + Validation) |  |  | ✓ | ✓ | 63 | 32 | 95 |
| 293463962 |  | ✓ | ✓ | ✓ | 8 | 17 | 25 |
| 21 | hsa-miR-186-5p | 3746855518 |  |  | ✓ | ✓ | 12 | 12 | 24 |
| 22 | hsa-miR-9-5p | 3724495219 | ✓ |  |  | ✓ | 20 | 10 | 30 |
| 23 | hsa-miR-152-3p | 228298059  (Discovery + Validation) |  |  |  | ✓ | 512 | 205 | 717 |
| 24 | hsa-miR-34a-5p | 3265447320 |  |  | ✓ | ✓ | 120 | 100 | 220 |
| 293463962 |  | ✓ | ✓ | ✓ | 8 | 17 | 25 |
| 25 | hsa-miR-155 | 296796268  (Screening + Validation) | ✓ |  | ✓ | ✓ | 60 | 40 | 100 |
| 26 | hsa-miR-326 | 293463962 |  | ✓ | ✓ | ✓ | 8 | 17 | 25 |
| 27 | hsa-miR-375-3p | 2944585121 |  |  | ✓ | ✓ | 19 | 16 | 35 |
| Sheet et al, 2019; International Journal of Pharmaceutical Research11 |  |  |  | ✓ | 20 | 10 | 30 |
| 3075928022 |  |  |  | ✓ | 46 | 48 | 94 |
| 2731404523 |  |  | ✓ | ✓ | 22 | 10 | 32 |
| 28 | hsa-miR-29a-3p | 228298059  (Discovery + Validation) |  |  |  | ✓ | 512 | 205 | 717 |
| Ibrahim et al, 2019; Gene reports24 |  |  | ✓ | ✓ | 120 | 60 | 180 |
| 275585307 |  |  |  | ✓ | 16 | 27 | 43 |
| 29 | hsa-miR-21-5p | 2944585121 |  |  | ✓ | ✓ | 19 | 16 | 35 |
| 315829773 |  |  |  | ✓ | 29 | 19 | 48 |
| 2493753225 |  |  | ✓ | ✓ | 68 | 79 | 147 |
| 296796268  (Screening + Validation) | ✓ |  |  | ✓ | 60 | 40 | 100 |
| 275585307 |  |  |  | ✓ | 16 | 27 | 43 |
| Ibrahim et al, 2019; Gene reports24 |  |  |  | ✓ | 120 | 60 | 180 |
| 30 | hsa-miR-103a-3p | 293463962 |  | ✓ | ✓ | ✓ | 8 | 17 | 25 |
| 296796268  (Screening + Validation) | ✓ |  | ✓ | ✓ | 60 | 40 | 100 |
| 31 | hsa-miR-126-3p | 275585307 |  |  |  | ✓ | 16 | 27 | 43 |
| 293463962 |  | ✓ | ✓ | ✓ | 8 | 17 | 25 |

**Extended data Table 1.** Analyses of all studies on microRNA biomarker discovery and/or validation using real-time quantitative (q)PCR, Next Generation (sequencing) platforms, or microarrays were assessed and significant microRNAs evaluated from these studies until 2020 (start of current study analyses). Similar papers of relevance to T1D (e.g. Santos AS et al PMID 35903753) were also identified to validate the relevance of these microRNAs in the recent years. The data on the number of samples analysed is presented above as reported in the listed publications (PMIDs) and the relevance of these microRNAs to the PREDICT T1D (**P**lasma **R**NA **E**valuation for **D**iagnosing **I**ncident risk of **C**linical **T**ype **1 D**iabetes) microRNA signature obtained herein is presented in **Figure 1b**.

**Extended Data Table 2:**

| **Study** | **Context** | **Group** | **Age** | | | | | | **Sex** | | | **Total (n)** |
| --- | --- | --- | --- | --- | --- | --- | --- | --- | --- | --- | --- | --- |
| Min | Mean | Median | max | SD | P-value | ♂ (n) | ♀ (n) | NA (n) |  |
| **Discovery Set** | IND | Developing pancreas  (Gestational age in weeks) | 8-12 | NA | NA | 36-37 | - | NA | NA | NA | 55 | 55 |
| AUS | Human tissues* | 16 | 47.8 | 49 | 71 | 11.4 | NA | 79 | 55 | 55 | 189 |
| Control plasma | 3.8 | 9.0 | 10.4 | 14.8 | 4.4 | 0.97 | 1 | 4 |  | 5 |
| **T1D** plasma | 4.2 | 8.9 | 10.4 | 14.0 | 4.1 | 1 | 4 |  | 5 |
| World-wide (reports until 2020) | **T1D** and Controlplasma/serum | n=2869 participants across 25 studies listed in Extended Data Table 1 (T1D: 1,757 and Controls: 1,112) | | | | | | As presented in reports listed under Extended Data Table 1 | | | 2869 |
| **Train / Test Set** | AUS | Control | 4.5 | 35.1 | 31.8 | 81.5 | 15.5 | <0.0001 | 93 | 114 | 2 | 209 |
| **T1D** | 0.6 | 21.6 | 15.7 | 73.7 | 16.2 | 247 | 272 |  | 519 |
| DNK | Siblings | 2 | 11.9 | 11 | 33 | 4.9 | <0.0001 | 151 | 141 |  | 292 |
| **T1D** | 0.6 | 9.9 | 10 | 17 | 3.8 | 174 | 142 |  | 316 |
| HKG | Control | 22 | 43.5 | 45 | 63 | 8.5 | <0.0001 | 64 | 54 |  | 118 |
| **T1D** | 8 | 27.4 | 24 | 70 | 13.0 | 53 | 67 |  | 120 |
| IND | Control | 5.98 | 15.3 | 17.67 | 35 | 7.5 | <0.0001 | 82 | 51 |  | 133 |
| **T1D** | 0.25 | 20.8 | 17.9 | 65.1 | 12.5 | 215 | 282 |  | 497 |
| **Validation Set** | AUS/NZL | Control | 2.4 | 27.4 | 32.6 | 55.0 | 15.3 | <0.0001 | 20 | 63 |  | 83 |
| **T1D** | 0.9 | 9.4 | 16.1 | 16.1 | 4.2 | 80 | 70 |  | 150 |
| IND | Control | 6.0 | 13.0 | 14.3 | 18.6 | 4.6 | NA | 8 | 72 |  | 80 |
|
| **T1D therapy** | CAN  (Established T1D therapy) | **T1D** islet transplant recipients | 39 | 53 | 53 | 66 | 7.8 | NA | 5 | 10 |  | 15 |
| USA  (An emerging T1D therapy) | **T1D** (Placebo) | 18.7 | 26.3 | 23.8 | 40.5 | 6.7 | 0.430 | 10 | 11 |  | 21 |
| **T1D** (Imatinib) | 19.0 | 27.8 | 26.2 | 45.2 | 6.8 | 27 | 17 |  | 43 |
| **Total** |  | | | | | | | | | | | 5,719 |

**Extended data Table 2**. Donor/participant details. Plasma samples were obtained from different contexts (AUS, CAN, DNK, HKG, IND, NZL and USA). Number of samples in each group along with their age and sex data are presented here. Significance for age difference between two groups (where available) was calculated using Welch’s t-test. Samples are stratified according to the study in which these were used (see Figure 1 and associated text). Human islets (n=134) and non-islet (n=55) human tissue donors (including n=15 endothelial cells donors, n=4 smooth muscle donors, 1 liver, 1 skin and 34 spleen tissue donors as indicated in 26 were used26. Mean and median for human fetal samples are not reported as the gestational age is an estimate of around 1 to 2 weeks, for several donors. *Mean, median age and sex for human islet donors (n=134) is provided here, whilst the non-islet (insulin non-producing) tissues were either from de-identified fetal (skin, liver) or adult (endothelial, smooth muscle, spleen) tissues. NA=not available.

**Extended Data Table 3**.

|  | Criterion | miRNA assay | Tissue levels | | Plasma levels  (Relative to Controls) | |
| --- | --- | --- | --- | --- | --- | --- |
| (Relative to insulin -ve tissues) | |
| Fold-change | p-value | Fold-change | p-value |
| 1 | Identified through discovery analyses | hsa-miR-145-5p | 53.75 | <0.001 | 4 | 0.198 |
| 2 | hsa-miR-181a-5p | -2.44 | <0.001 | 1.62 | 0.361 |
| 3 | hsa-miR-127-3p | 60.75 | <0.001 | 2.62 | 0.122 |
| 4 | hsa-miR-125b-5p | 22.66 | <0.001 | -1.25 | 0.395 |
| 5 | hsa-miR-199a-3p | 8.31 | <0.001 | 4.16 | 0.062 |
| 6 | hsa-miR-148a-3p | 74.45 | <0.001 | 3.33 | 0.483 |
| 7 | hsa-miR-210-3p | 14.47 | <0.001 | -1.34 | 0.377 |
| 8 | hsa-miR-93-5p | -3.31 | <0.001 | 1.71 | 0.282 |
| 9 | hsa-miR-27a-3p | -4.82 | <0.001 | 2.45 | 0.112 |
| 10 | hsa-miR-15b-5p | 1.62 | 0.001 | 3.31 | 0.072 |
| 11 | hsa-miR-20a-5p | -3.18 | <0.001 | 3.79 | 0.15 |
| 12 | hsa-miR-16-5p | 1.80 | 0.003 | 1.4 | 0.455 |
| 13 | hsa-miR-25-3p | 1.40 | <0.001 | 1.23 | 0.639 |
| 14 | hsa-miR-30a-5p | 4.77 | <0.001 | 1.61 | 0.298 |
| 15 | hsa-miR-200a-3p | 109920.79 | <0.001 | -1.05 | 0.983 |
| 16 | hsa-miR-26b-5p | 1.79 | <0.001 | 5.67 | 0.144 |
| 17 | hsa-miR-146a-5p | -9.36 | <0.001 | 3.25 | 0.053 |
| 18 | hsa-miR-24-3p | 2.50 | <0.001 | 3.19 | 0.009 |
| 19 | hsa-miR-340-3p | 2.20 | <0.001 | 8.79 | 0.043 |
| 20 | hsa-miR-30b-5p | 3.59 | <0.001 | 3.75 | 0.036 |
| 21 | hsa-miR-22-5p | 3.45 | <0.001 | 4.24 | 0.021 |
| 22 | hsa-miR-27b-3p | 36.80 | <0.001 | 2.24 | 0.042 |
| 23 | hsa-miR-30c-5p | 2.84 | <0.001 | 3.71 | 0.023 |
| 24 | hsa-miR-26a-5p | 4.32 | <0.001 | 6.62 | 0.023 |
| 25 | hsa-miR-125a-5p | 10.34 | <0.001 | 22.7 | 0.046 |
| 26 | hsa-miR-301b-3p | 2.48 | 0.021 | 6.81 | 0.023 |
| 27 | hsa-miR-99b-5p | 13.34 | <0.001 | 4.72 | 0.024 |
| 28 | hsa-miR-409-5p | 352.33 | <0.001 | 2.45 | 0.032 |
| 29 | hsa-let-7e-5p | 3.86 | <0.001 | 3.66 | 0.023 |
| 30 | hsa-miR-222-3p | 1.14 | 0.731 | 4.15 | 0.001 |
| 31 | hsa-miR-186-5p | 1.40 | 0.012 | 3.21 | 0.037 |
| 32 | hsa-miR-9-5p | 2.77 | 0.037 | 2.33 | 0.087 |
| 33 | hsa-miR-92a-3p | 1.31 | 0.008 | 1.44 | 0.377 |
| 34 | β-cell development | hsa-miR-152-3p | 2.06 | <0.001 | 1.8 | 0.075 |
| 35 | hsa-miR-34a-5p | 3.80 | <0.001 | -1.12 | 0.644 |
| 36 | hsa-miR-30e-3p | 3.41 | <0.001 | 3.33 | 0.114 |
| 37 | hsa-miR-155 | -38.05 | <0.001 | 3.31 | 0.059 |
| 38 | hsa-miR-326 | -43.51 | <0.001 | 3.12 | 0.076 |
| 39 | dme-miR-7 (hsa-miR-7-1) | 2271.7 | <0.001 | -1.79 | 0.2 |
| 40 | hsa-miR-375-3p | 1617420.06 | <0.001 | -1.72 | 0.437 |
| 41 | hsa-miR-223-3p | -36.61 | <0.001 | 7.79 | 0.017 |
| 42 | hsa-miR-29a-3p | 1.34 | 0.049 | 1.99 | 0.037 |

**Extended data Table 3**. PREDICT microRNA signature composition derived through discovery wet-lab analyses. All selected microRNAs and their relative levels (fold expression differences) are calculated as described in the methods section. Statistical significance was calculated using Welch’s t-test wherein comparisons were made between the levels of plasma microRNA in cases (individuals newly diagnosed with T1D) to those that are age and sex-matched controls. Tissue samples were compared across human islet microRNAs and human non-pancreatic insulin-negative tissues. Details of human islet donors are available in **Extended Data Table 2** and presented earlier 26,27.

**Extended Data Table 4:**

|  | Criterion | Assay ID | miRNA assay |  |  |  |
| --- | --- | --- | --- | --- | --- | --- |
| Chromosome | Genomic location based on GRCh38.p14 NCBI Gene | miRbase link |
|  |  |  |
| 1 | Identified through discovery analyses | 002278_hsa-miR-145_A | hsa-miR-145-5p | Chr5 | 149430646..149430733 | https://mirbase.org/mature/MIMAT0000437 |
| 2 | 000480_hsa-miR-181a_A | hsa-miR-181a-5p | Chr1 | 198859044..198859153 | https://mirbase.org/mature/MIMAT0000256 |
| 3 | 000452_hsa-miR-127_A | hsa-miR-127-3p | Chr14 | 100882979..100883075 | https://mirbase.org/mature/MIMAT0000446 |
| 4 | 000449_hsa-miR-125b_A | hsa-miR-125b-5p | Chr11 | 122099757..122099844 | https://mirbase.org/mature/MIMAT0000423 |
| 5 | 002304_hsa-miR-199a-3p_A | hsa-miR-199a-3p | Chr19 | 10817426..10817496 | https://mirbase.org/mature/MIMAT0000232 |
| 6 | 000470_hsa-miR-148a_A | hsa-miR-148a-3p | Chr7 | 25949919..25949986 | https://mirbase.org/mature/MIMAT0000243 |
| 7 | 000512_hsa-miR-210_A | hsa-miR-210-3p | Chr11 | 568089..568198 | https://mirbase.org/mature/MIMAT0000267 |
| 8 | 001090_mmu-miR-93_A | hsa-miR-93-5p | Chr7 | 100093768 - 100093847 | https://mirbase.org/mature/MIMAT0000093 |
| 9 | 000408_hsa-miR-27a_A | hsa-miR-27a-3p | Chr19 | 13836440..13836517 | https://mirbase.org/mature/MIMAT0000084 |
| 10 | 000390_hsa-miR-15b_A | hsa-miR-15b-5p | Chr3 | 160404588..160404685 | https://mirbase.org/mature/MIMAT0000417 |
| 11 | 000580_hsa-miR-20a_A | hsa-miR-20a-5p | Chr13 | 91351065..91351135 | https://mirbase.org/mature/MIMAT0000075 |
| 12 | 000391_hsa-miR-16_A | hsa-miR-16-5p | Chr13 | 50048973..50049061 | https://mirbase.org/mature/MIMAT0000069 |
| 13 | 000403_hsa-miR-25_A | hsa-miR-25-3p | Chr7 | 100093560..100093643 | https://mirbase.org/mature/MIMAT0000081 |
| 14 | 000417_hsa-miR-30a-5p_B | hsa-miR-30a-5p | Chr6 | 71403551..71403621 | https://mirbase.org/mature/MIMAT0000087 |
| 15 | 000502_hsa-miR-200a_A | hsa-miR-200a-3p | Chr1 | 1167863..1167952 | https://mirbase.org/mature/MIMAT0000682 |
| 16 | 000407_hsa-miR-26b_A | hsa-miR-26b-5p | Chr2 | 218402646..218402722 | https://mirbase.org/mature/MIMAT0000083 |
| 17 | 000468_hsa-miR-146a_A | hsa-miR-146a-5p | Chr5 | 160485352..160485450 | https://mirbase.org/mature/MIMAT0000449 |
| 18 | 000402_hsa-miR-24_A | hsa-miR-24-3p | Chr9 | 95086021..95086088 | https://mirbase.org/mature/MIMAT0000080 |
| 19 | 002259_hsa-miR-340#_B | hsa-miR-340-3p | Chr5 | 180015303..180015397 | https://mirbase.org/mature/MIMAT0000750 |
| 20 | 000602_hsa-miR-30b_A | hsa-miR-30b-5p | Chr8 | 134800520..134800607 | https://mirbase.org/hairpin/MI0000441?acc=MI0000441 |
| 21 | 002301_hsa-miR-22#_B | hsa-miR-22-5p | Chr17 | 1713903 - 1713987 | https://mirbase.org/mature/MIMAT0004495 |
| 22 | 000409_hsa-miR-27b_A | hsa-miR-27b-3p | Chr9 | 95085445..95085541 | https://mirbase.org/mature/MIMAT0000419 |
| 23 | 000419_hsa-miR-30c_A | hsa-miR-30c-5p | Chr1 | 40757284..40757372 | https://mirbase.org/mature/MIMAT0000244 |
| 24 | 000405_hsa-miR-26a_A | hsa-miR-26a-5p | Chr3 | 37969404..37969480 | https://mirbase.org/mature/MIMAT0000082 |
| 25 | 002198_hsa-miR-125a-5p_A | hsa-miR-125a-5p | Chr19 | 51693254..51693339 | https://mirbase.org/mature/MIMAT0000443 |
| 26 | 002392_hsa-miR-301b_A | hsa-miR-301b-3p | Chr22 | 21652981..21653058 | https://mirbase.org/mature/MIMAT0004958 |
| 27 | 000436_hsa-miR-99b_A | hsa-miR-99b-5p | Chr19 | 51692612..51692681 | https://mirbase.org/mature/MIMAT0000689 |
| 28 | 002331_hsa-miR-409-5p_A | hsa-miR-409-5p | Chr14 | 101065300..101065378 | https://mirbase.org/mature/MIMAT0001638 |
| 29 | 002406_hsa-let-7e_A | hsa-let-7e-5p | Chr19 | 51692786..51692864 | https://mirbase.org/mature/MIMAT0000066 |
| 30 | 002276_hsa-miR-222_A | hsa-miR-222-3p | ChrX | 45747015..45747124 | https://mirbase.org/mature/MIMAT0000279 |
| 31 | 002285_hsa-miR-186_A | hsa-miR-186-5p | Chr1 | 71067631..71067716 | https://mirbase.org/mature/MIMAT0000456 |
| 32 | 000583_hsa-miR-9_A | hsa-miR-9-5p | Chr1 | 156420341 - 156420429 | https://mirbase.org/mature/MIMAT0000441 |
| 33 | 000431_hsa-miR-92a_A | hsa-miR-92a-3p | Chr13 | 91351314..91351391 | https://mirbase.org/mature/MIMAT0000092 |
| 34 | β-cell development | 000475_hsa-miR-152_A | hsa-miR-152-3p | Chr17 | 48037161..48037247 | https://mirbase.org/mature/MIMAT0000438 |
| 35 | 000426_hsa-miR-34a_A | hsa-miR-34a-5p | Chr1 | 9151668..9151777 | https://mirbase.org/mature/MIMAT0000255 |
| 36 | 000422_hsa-miR-30e-3p_B | hsa-miR-30e-3p | Chr1 | 40754355..40754446 | https://mirbase.org/mature/MIMAT0000693 |
| 37 | 002623_hsa-miR-155_A | hsa-miR-155 | Chr21 | 25573980..25574044 | https://mirbase.org/hairpin/MI0000681 |
| 38 | 000542_hsa-miR-326_A | hsa-miR-326 | Chr11 | 75335092..75335186 | https://mirbase.org/hairpin/MI0000808 |
| 39 | 000268_dme-miR-7_B | dme-miR-7  (hsa-miR-7-1) | Chr9 | 83969748..83969857 | https://mirbase.org/hairpin/MI0000263?acc=MI0000263 |
| 40 | 000564_hsa-miR-375_A | hsa-miR-375-3p | Chr2 | 219001645..219001708 | https://mirbase.org/mature/MIMAT0000728 |
| 41 | 002295_hsa-miR-223_A | hsa-miR-223-3p | ChrX | 66018870..66018979 | https://mirbase.org/mature/MIMAT0000280 |
| 42 | 002112_hsa-miR-29a_A | hsa-miR-29a-3p | Chr7 | 130876747..130876810 | https://mirbase.org/mature/MIMAT0000086 |
| 43 | From literature | 000397_hsa-miR-21_A | hsa-miR-21-5p (2-5) | Chr17 | 59841266..59841337 | https://mirbase.org/mature/MIMAT0000076 |
| 44 | 000439_hsa-miR-103_A | hsa-miR-103a-3p (5, 6) | Chr5 | 168560896..168560973 | https://mirbase.org/mature/MIMAT0000101 |
| 45 | 002431_hsa-miR-625_A | hsa-miR-625-5p (7) | Chr14 | 65471102..65471186 | https://mirbase.org/mature/MIMAT0003294 |
| 46 | 000563_hsa-miR-374_A | hsa-miR-374a-5p (8, 9) | ChrX | 74287286..74287357 | https://mirbase.org/mature/MIMAT0000727 |
| 47 | 002228_hsa-miR-126_A | hsa-miR-126-3p (3, 10) | Chr9 | 136670602..136670686 | https://mirbase.org/mature/MIMAT0000445 |
| 48 | -ve Ctr | 001526_hsa-miR-558_B | hsa-miR-558 | Chr2 | 90299466..90299558 | https://mirbase.org/hairpin/MI0003564 |
| 49 | 002106_hsa-miR-188-3p_A | hsa-miR-188-3p | ChrX | 50003503..50003588 | https://mirbase.org/mature/MIMAT0004613 |
| 50 | 002211_hsa-miR-220c_A | hsa-miR-220c | Chr19 | 49063529..49063611 | https://mirbase.org/hairpin/MI0005536 |

**Extended Data Table 4: Genomic location and PREDICT T1D microRNA signature assay IDs (available through ThermoFisher Scientific).** PREDICT T1D microRNA name, assay ID, mature miRNA sequence along with their chromosome and genomic location is presented here.

**Extended Data Figure 1**


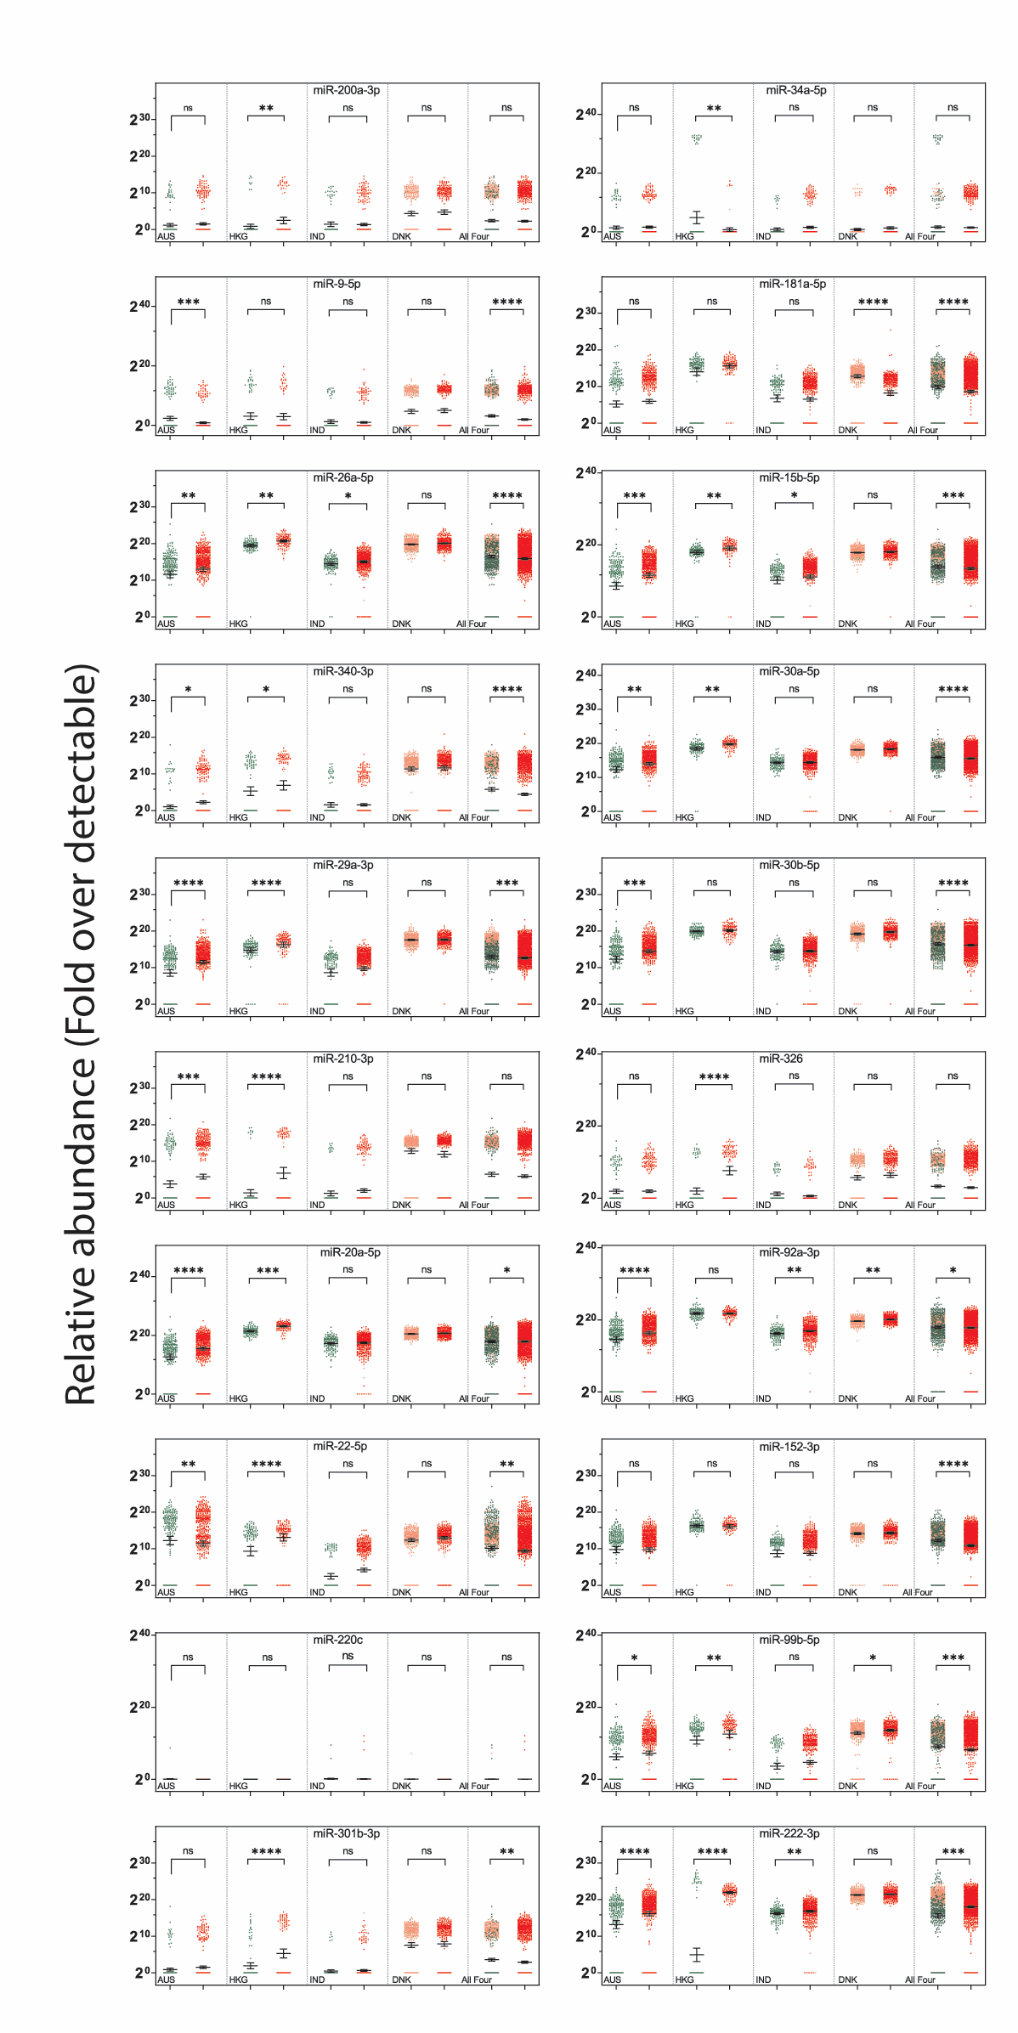


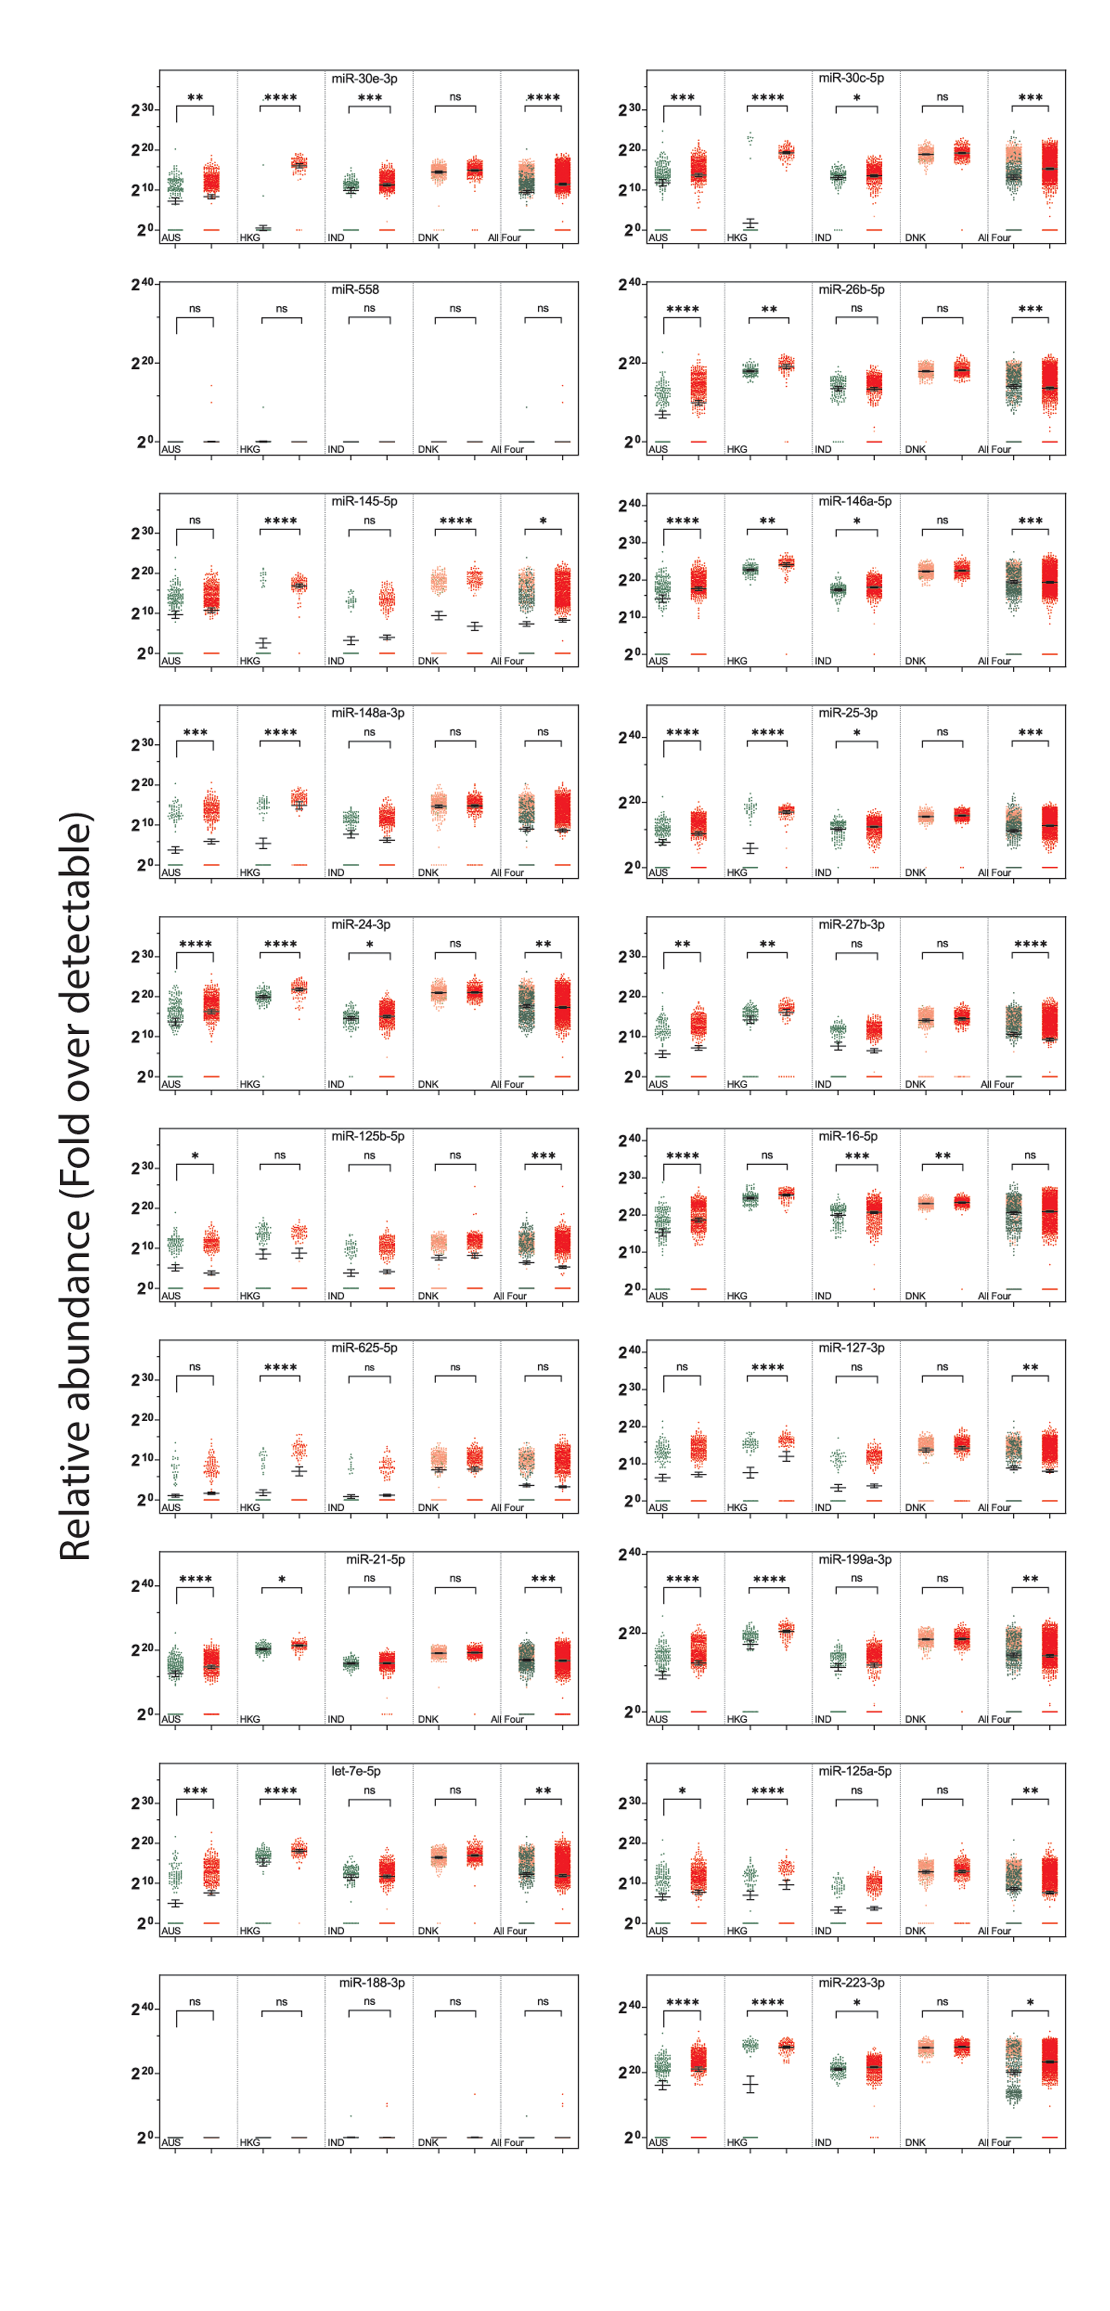


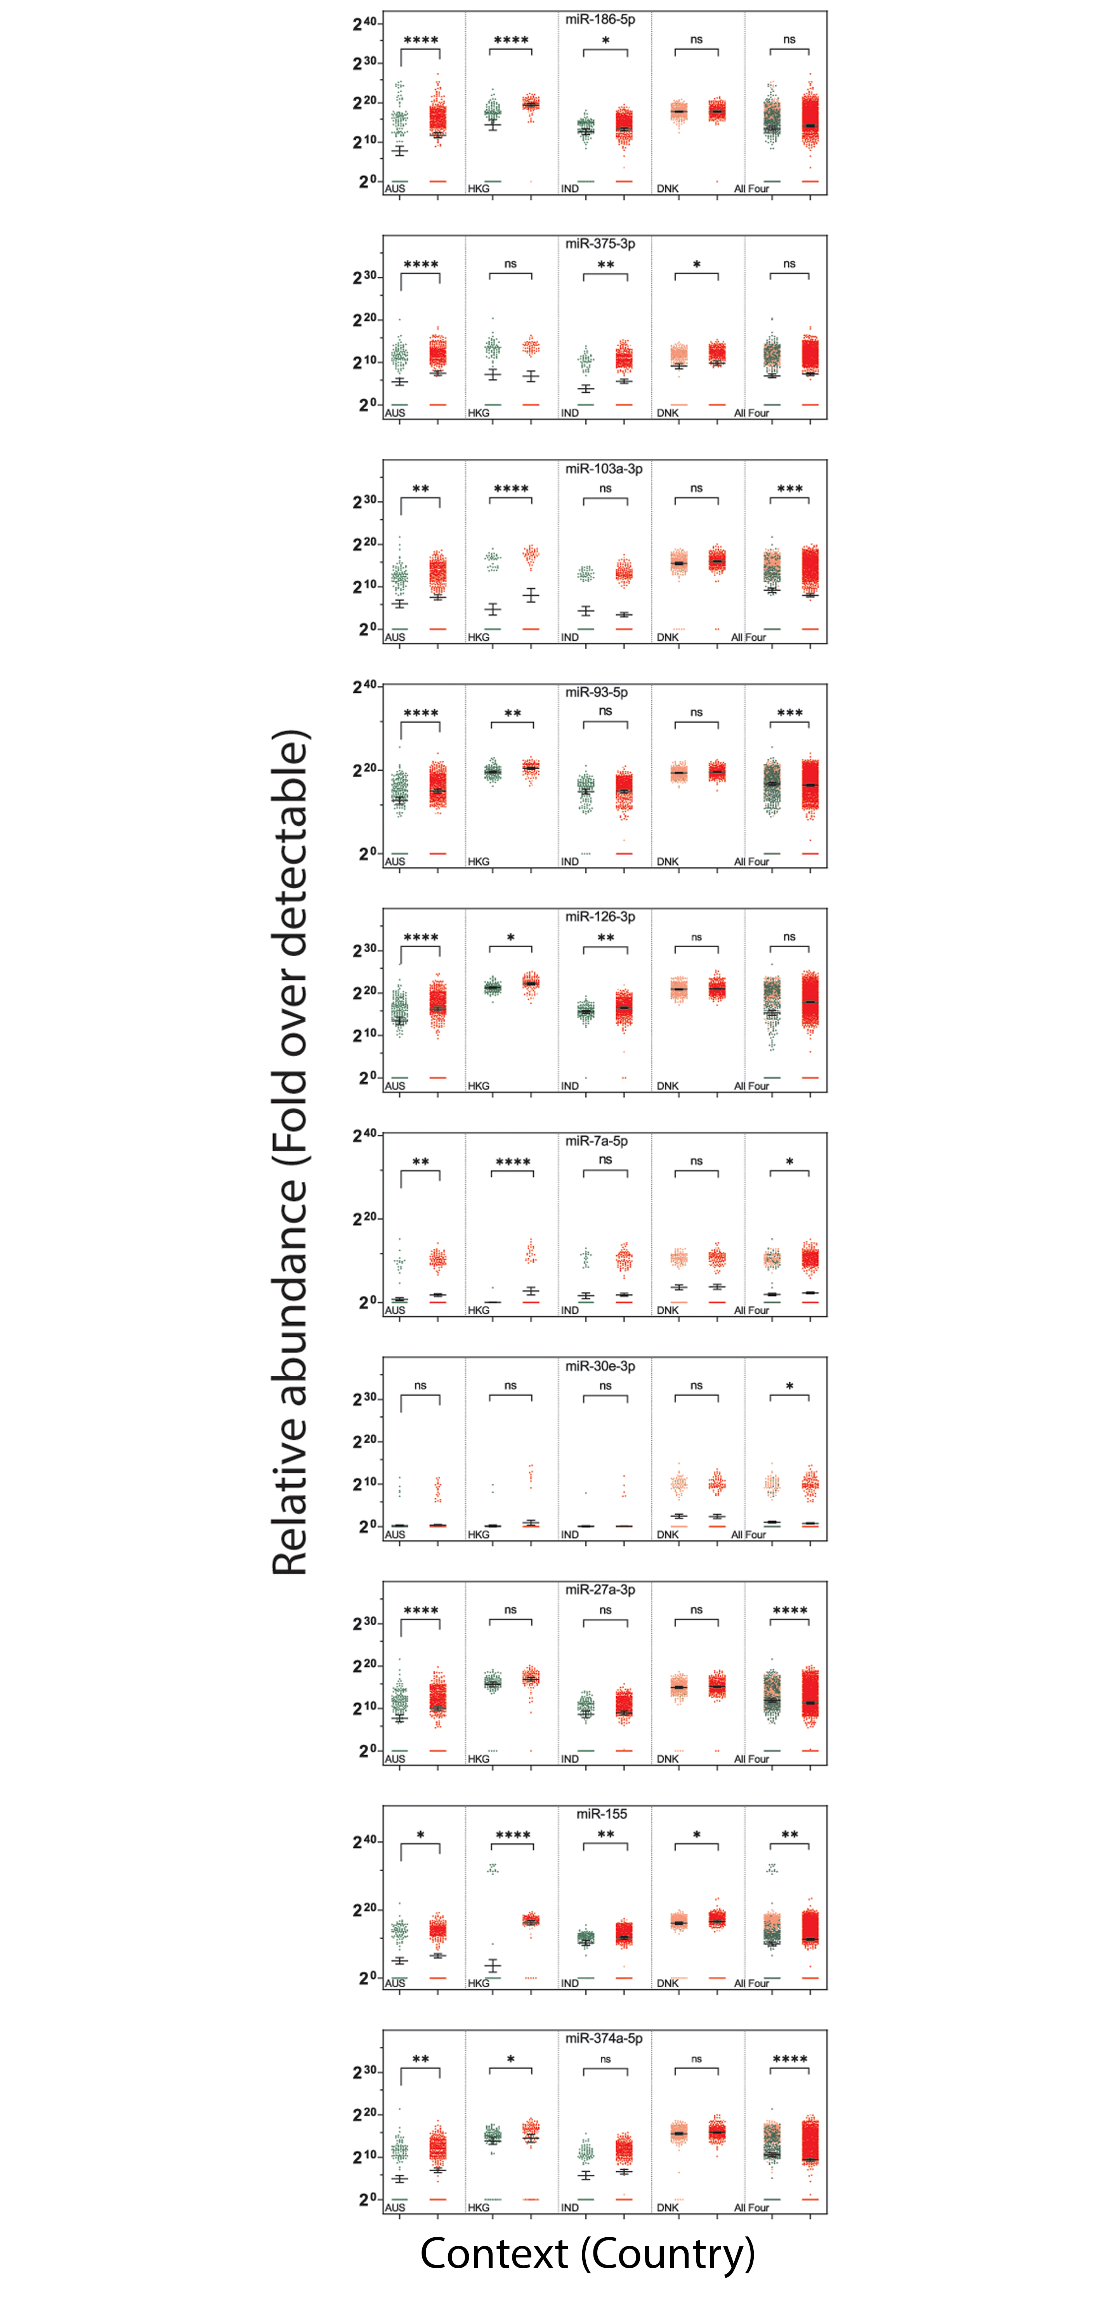


**Extended Data Figure 1: Expression of the 50 selected microRNAs across the four contexts.** Related to Figure 2. Relative distribution of the 50 PREDICT T1D microRNAs in the circulation of 4C study participants. Y-axis presents abundance (fold-over-detectable) for each microRNA in the four contexts (AUS, HKG, IND, DNK) and all four contexts together (“All Four”). Green colour denotes Control samples, while dark Red colour indicates T1D microRNA expression. For DNK, since the Controls are siblings of individuals with T1D, they are presented with a lighter Red colour. Significance is calculated using Kruskal-Wallis test with uncorrected Dunn’s multiple comparison. NS= not significant; *=p<0.05; **=p<0.01; ***=p<0.001, ****=p<0.0001.

**Extended Data Figure 2**

**Extended Data Figure 2: PREDICT T1D microRNA signature in 4C cohort.** A Circos plot provides relative genomic location of each microRNA on the chromosomes. Links connecting different microRNAs represent co-linearity of different microRNAs (spearman correlation coefficient >0.9 and p<0.05) within four different contexts (AUS, DNK, HKG, IND), each presented with a different colour.

**Extended data Figure 3**


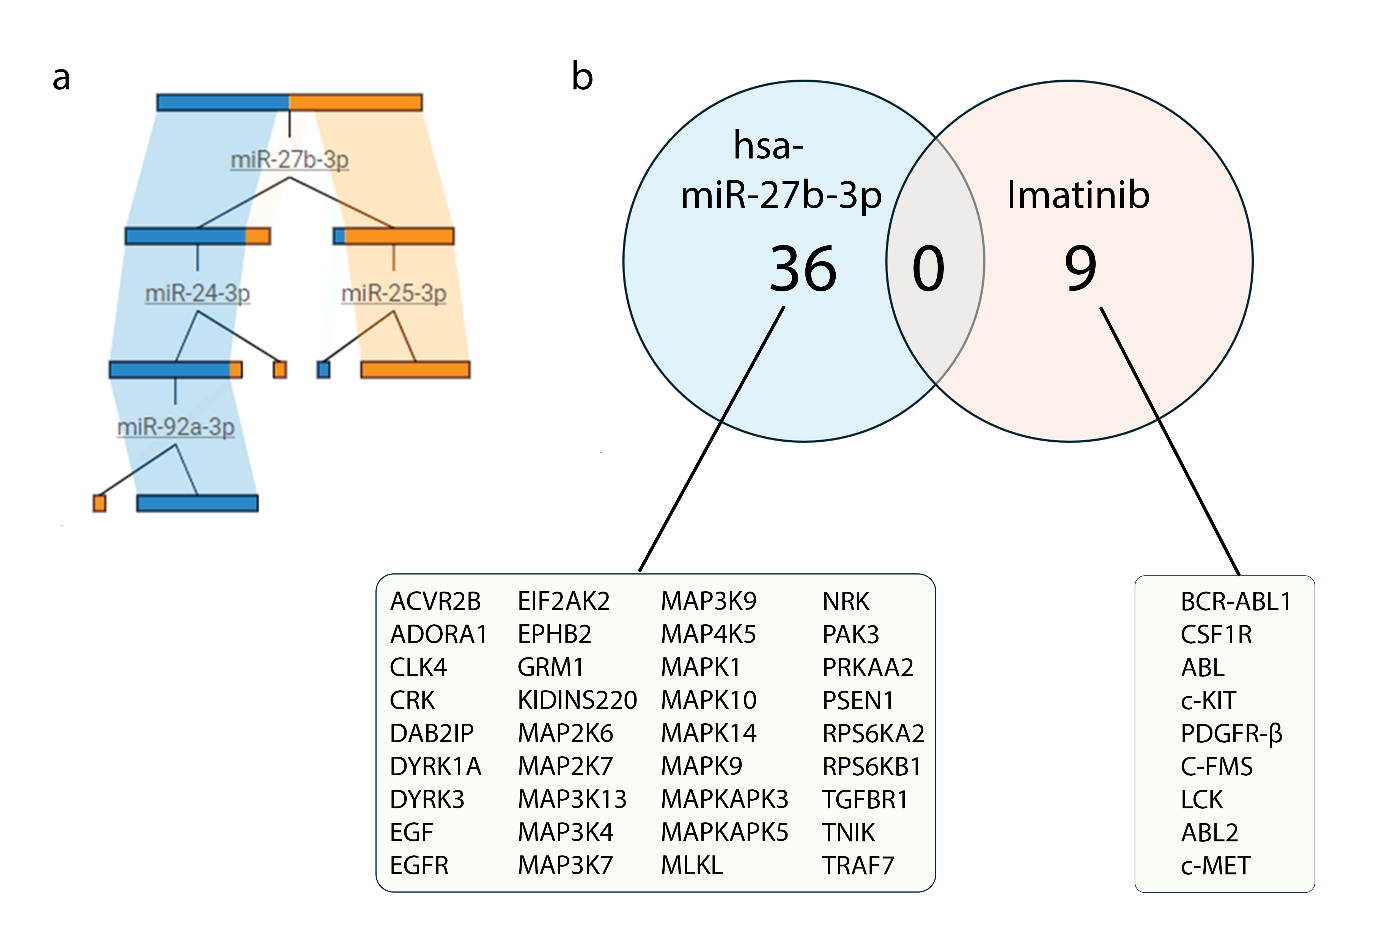


**Extended Data Figure 3: Pathway analyses of key microRNAs indicates potential synergism.** Related to Figure 5. **a**. the decision tree for key variables from our eDRS4C that aid in the segregation of UQ and LQ responders to Imatinib therapy. **b.** Venn diagram represents 36 genes involved in the tyrosine kinase pathway that are targeted by hsa-mir-27b-3p (GO:0004712) and nine tyrosine kinase genes reportedly inhibited by imatinib28-36.

References to extended dataset

1. Fendler, W.*, et al.* Differential regulation of serum microRNA expression by HNF1beta and HNF1alpha transcription factors. *Diabetologia* **59**, 1463-1473 (2016).

2. Akerman, L., Casas, R., Ludvigsson, J., Tavira, B. & Skoglund, C. Serum miRNA levels are related to glucose homeostasis and islet autoantibodies in children with high risk for type 1 diabetes. *PLoS One* **13**, e0191067 (2018).

3. Liu, Y.*, et al.* Decreased Serum microRNA-21, microRNA-25, microRNA-146a, and microRNA-181a in Autoimmune Diabetes: Potential Biomarkers for Diagnosis and Possible Involvement in Pathogenesis. *Int J Endocrinol* **2019**, 8406438 (2019).

4. Nabih, E.S. & Andrawes, N.G. The Association Between Circulating Levels of miRNA-181a and Pancreatic Beta Cells Dysfunction via SMAD7 in Type 1 Diabetic Children and Adolescents. *J Clin Lab Anal* **30**, 727-731 (2016).

5. Frorup, C.*, et al.* Plasma Exosome-Enriched Extracellular Vesicles From Lactating Mothers With Type 1 Diabetes Contain Aberrant Levels of miRNAs During the Postpartum Period. *Front Immunol* **12**, 744509 (2021).

6. Satake, E.*, et al.* Circulating miRNA Profiles Associated With Hyperglycemia in Patients With Type 1 Diabetes. *Diabetes* **67**, 1013-1023 (2018).

7. Seyhan, A.A.*, et al.* Pancreas-enriched miRNAs are altered in the circulation of subjects with diabetes: a pilot cross-sectional study. *Sci Rep* **6**, 31479 (2016).

8. Assmann, T.S.*, et al.* MicroRNA expression profile in plasma from type 1 diabetic patients: Case-control study and bioinformatic analysis. *Diabetes Res Clin Pract* **141**, 35-46 (2018).

9. Nielsen, L.B.*, et al.* Circulating levels of microRNA from children with newly diagnosed type 1 diabetes and healthy controls: evidence that miR-25 associates to residual beta-cell function and glycaemic control during disease progression. *Exp Diabetes Res* **2012**, 896362 (2012).

10. Garcia-Contreras, M.*, et al.* Plasma-derived exosome characterization reveals a distinct microRNA signature in long duration Type 1 diabetes. *Sci Rep* **7**, 5998 (2017).

11. Mohammed, M. & Khudhair, H. Possible Roles of miRNAs-25 and 375 as Potent Biomarkers for β-cells Stress and/or Death in Diabetes Type 1 Patients and their First Degree Relatives. **11**, 148-155 (2019).

12. Liu, L.*, et al.* Two Novel MicroRNA Biomarkers Related to beta-Cell Damage and Their Potential Values for Early Diagnosis of Type 1 Diabetes. *J Clin Endocrinol Metab* **103**, 1320-1329 (2018).

13. Garavelli, S.*, et al.* Blood Co-Circulating Extracellular microRNAs and Immune Cell Subsets Associate with Type 1 Diabetes Severity. *Int J Mol Sci* **21**(2020).

14. Barseem, N.F., Mahasab, M.M., Zaed, I.F., Said, A.E.A. & El Gayed, E.M.A. Genetic Indices Relationship to Hyperglycemia-associated Biomarkers: Consistency with miRNA Expression in Egyptian Children with T1DM. *J Clin Res Pediatr Endocrinol* **14**, 76-86 (2022).

15. Garavelli, S.*, et al.* Plasma circulating miR-23~27~24 clusters correlate with the immunometabolic derangement and predict C-peptide loss in children with type 1 diabetes. *Diabetologia* **63**, 2699-2712 (2020).

16. Erener, S., Marwaha, A., Tan, R., Panagiotopoulos, C. & Kieffer, T.J. Profiling of circulating microRNAs in children with recent onset of type 1 diabetes. *JCI Insight* **2**, e89656 (2017).

17. Malachowska, B.*, et al.* Temporal dynamics of serum let-7g expression mirror the decline of residual beta-cell function in longitudinal observation of children with type 1 diabetes. *Pediatr Diabetes* **19**, 1407-1415 (2018).

18. Swolin-Eide, D.*, et al.* Circulating microRNAs in young individuals with long-duration type 1 diabetes in comparison with healthy controls. *Sci Rep* **13**, 11634 (2023).

19. Morales-Sanchez, P.*, et al.* Circulating miRNA expression in long-standing type 1 diabetes mellitus. *Sci Rep* **13**, 8611 (2023).

20. Ibrahim, A.A., Wahby, A.A., Ashmawy, I., Saleh, R.M. & Soliman, H. Association of Exosomal miR-34a with Markers of Dyslipidemia and Endothelial Dysfunction in Children and Adolescents with T1DM. *J Clin Res Pediatr Endocrinol* **12**, 401-409 (2020).

21. Lakhter, A.J.*, et al.* Beta cell extracellular vesicle miR-21-5p cargo is increased in response to inflammatory cytokines and serves as a biomarker of type 1 diabetes. *Diabetologia* **61**, 1124-1134 (2018).

22. Bertoccini, L.*, et al.* Circulating miRNA-375 levels are increased in autoantibodies-positive first-degree relatives of type 1 diabetes patients. *Acta Diabetol* **56**, 707-710 (2019).

23. Marchand, L.*, et al.* miRNA-375 a Sensor of Glucotoxicity Is Altered in the Serum of Children with Newly Diagnosed Type 1 Diabetes. *J Diabetes Res* **2016**, 1869082 (2016).

24. Ibrahim, A.A.*, et al.* Expression of exosomal miR-21 and miR-29 in serum of children and adolescents with T1DM and persistent microalbuminuria. *Gene Reports* **16**, 100461 (2019).

25. Osipova, J.*, et al.* Diabetes-associated microRNAs in pediatric patients with type 1 diabetes mellitus: a cross-sectional cohort study. *J Clin Endocrinol Metab* **99**, E1661-1665 (2014).

26. Wong, W.K.M.*, et al.* Machine learning workflows identify a microRNA signature of insulin transcription in human tissues. *iScience* **24**, 102379 (2021).

27. Wong, W.K.*, et al.* The long noncoding RNA MALAT1 predicts human pancreatic islet isolation quality. *JCI Insight* **5**(2019).

28. Dewar, A.L.*, et al.* Macrophage colony-stimulating factor receptor c-fms is a novel target of imatinib. *Blood* **105**, 3127-3132 (2005).

29. Druker, B.J.*, et al.* Effects of a selective inhibitor of the Abl tyrosine kinase on the growth of Bcr–Abl positive cells. *Nature medicine* **2**, 561-566 (1996).

30. Hoemberger, M., Pitsawong, W. & Kern, D. Cumulative mechanism of several major imatinib-resistant mutations in Abl kinase. *Proceedings of the National Academy of Sciences* **117**, 19221-19227 (2020).

31. Hu, X.*, et al.* Imatinib inhibits CSF1R that stimulates proliferation of rheumatoid arthritis fibroblast-like synoviocytes. *Clinical & Experimental Immunology* **195**, 237-250 (2019).

32. Krause, D.S. & Van Etten, R.A. Tyrosine kinases as targets for cancer therapy. *New England Journal of Medicine* **353**, 172-187 (2005).

33. Lee, K.*, et al.* Lck is a key target of imatinib and dasatinib in T-cell activation. *Leukemia* **24**, 896-900 (2010).

34. O'Brien, S.G.*, et al.* Imatinib compared with interferon and low-dose cytarabine for newly diagnosed chronic-phase chronic myeloid leukemia. *New England Journal of Medicine* **348**, 994-1004 (2003).

35. Salah, E.*, et al.* Crystal structures of ABL-related gene (ABL2) in complex with imatinib, tozasertib (VX-680), and a type I inhibitor of the triazole carbothioamide class. *Journal of medicinal chemistry* **54**, 2359-2367 (2011).

36. Seeliger, M.A.*, et al.* c-Src binds to the cancer drug imatinib with an inactive Abl/c-Kit conformation and a distributed thermodynamic penalty. *Structure* **15**, 299-311 (2007).
